# Supplementary material for: The plasma phospholipidome of the bottlenose dolphin ( Tursiops truncatus ) is modulated by both sex and developmental stage
Source: Royal Society of Chemistry journal article supplement (doi:10.1039/d2mo00202g), 2022-10-24
Supplement: d2mo00202g1.pdf [file d2mo00202g1.pdf]

**Supplementary Table S1**

Molecular species identified by mass accuracy HILIC–LC–MS and characterized by MS/MS analyses in *Tursiops truncatus* plasma

C represents the total number of carbon atoms and N the total number of double bonds on the fatty acyl chains.

| Lipid species (C:N)                              | Calculated <i>m/z</i> | Observed <i>m/z</i> | Error (ppm) | Fatty acyl chains (C:N) | Formula    |
|--------------------------------------------------|-----------------------|---------------------|-------------|-------------------------|------------|
| <b>LPC identified as [M + CH<sub>3</sub>COO]</b> |                       |                     |             |                         |            |
| LPC(O-14:0)                                      | 512.3352              | 512.3356            | 0.7183      | <i>a</i>                | C24H51NO8P |
| LPC(14:1)                                        | 524.2988              | 524.2994            | 1.0547      | <i>b</i>                | C24H47NO9P |
| LPC(14:0)                                        | 526.3145              | 526.3144            | -0.1843     | (14:0)                  | C24H49NO9P |
| LPC(15:1)                                        | 538.3145              | 538.3150            | 0.9344      | (15:1)                  | C25H49NO9P |
| LPC(P-16:0)/LPC(O-16:1)                          | 538.3509              | 538.3517            | 1.5195      | (P-16:0)                | C26H53NO8P |
| LPC(15:0)                                        | 540.3301              | 540.3314            | 2.3190      | (15:0)                  | C25H51NO9P |
| LPC(O-16:0)                                      | 540.3665              | 540.3671            | 1.0511      | <i>b</i>                | C26H55NO8P |
| LPC(16:1)                                        | 552.3301              | 552.3313            | 2.0875      | (16:1)                  | C26H51NO9P |
| LPC(16:0)                                        | 554.3458              | 554.3470            | 2.1719      | (16:0)                  | C26H53NO9P |
| LPC(17:2)                                        | 564.3301              | 564.3309            | 1.3343      | (17:2)                  | C27H51NO9P |
| LPC(17:1)                                        | 566.3458              | 566.3471            | 2.3007      | (17:1)                  | C27H53NO9P |
| LPC(P-18:0)/LPC(O-18:1)                          | 566.3822              | 566.3825            | 0.5615      | <i>b</i>                | C28H57NO8P |
| LPC(17:0)                                        | 568.3614              | 568.3627            | 2.2046      | (17:0)                  | C27H55NO9P |
| LPC(O-18:0)                                      | 568.3978              | 568.3981            | 0.4715      | <i>b</i>                | C28H59NO8P |
| LPC(18:4)                                        | 574.3145              | 574.3154            | 1.5723      | (18:4)                  | C28H49NO9P |
| LPC(18:3)                                        | 576.3301              | 576.3309            | 1.3065      | (18:3)                  | C28H51NO9P |
| LPC(18:2)                                        | 578.3458              | 578.3466            | 1.3902      | (18:2)                  | C28H53NO9P |
| LPC(18:1)                                        | 580.3614              | 580.3621            | 1.1252      | (18:1)                  | C28H55NO9P |
| LPC(18:0)                                        | 582.3771              | 582.3779            | 1.3788      | (18:0)                  | C28H57NO9P |
| LPC(19:2)                                        | 592.3614              | 592.3622            | 1.2712      | (19:2)                  | C29H55NO9P |
| LPC(19:1)                                        | 594.3771              | 594.3777            | 1.0145      | (19:1)                  | C29H57NO9P |
| LPC(P-20:0)/LPE(O-20:1)                          | 594.4135              | 594.4144            | 1.5444      | <i>b</i>                | C30H61NO8P |
| LPC(O-20:0)                                      | 596.4291              | 596.4291            | -0.0537     | <i>b</i>                | C30H63NO8P |
| LPC(20:5)                                        | 600.3301              | 600.3313            | 1.9206      | (20:5)                  | C30H51NO9P |
| LPC(20:4)                                        | 602.3458              | 602.3465            | 1.1688      | (20:4)                  | C30H53NO9P |
| LPC(20:3)                                        | 604.3614              | 604.3615            | 0.0877      | <i>a</i>                | C30H55NO9P |
| LPC(20:2)                                        | 606.3771              | 606.3772            | 0.1699      | (20:2)                  | C30H57NO9P |
| LPC(20:1)                                        | 608.3927              | 608.3944            | 2.7170      | (20:1)                  | C30H59NO9P |
| LPC(20:0)                                        | 610.4084              | 610.4083            | -0.1589     | (20:0)                  | C30H61NO9P |
| LPC(21:1)                                        | 622.4084              | 622.4092            | 1.2901      | (21:1)                  | C31H61NO9P |
| LPC(P-22:0)/LPC(O-22:1)                          | 622.4448              | 622.4452            | 0.6715      | <i>a</i>                | C32H65NO8P |
| LPC(21:0)                                        | 624.4240              | 624.4244            | 0.5653      | <i>a</i>                | C31H63NO9P |
| LPC(22:6)                                        | 626.3458              | 626.3474            | 2.5609      | (22:6)                  | C32H53NO9P |
| LPC(22:5)                                        | 628.3614              | 628.3618            | 0.5618      | (22:5)                  | C32H55NO9P |
| LPC(22:4)                                        | 630.3771              | 630.3771            | 0.0048      | <i>a</i>                | C32H57NO9P |
| LPC(22:2)                                        | 634.4084              | 634.4084            | 0.0047      | (22:2)                  | C32H61NO9P |
| LPC(22:1)                                        | 636.4240              | 636.4246            | 0.8705      | (22:1)                  | C32H63NO9P |
| LPC(24:6)                                        | 654.3771              | 654.3776            | 0.7687      | (24:6)                  | C34H57NO9P |
| LPC(24:5)                                        | 656.3927              | 656.3936            | 1.2995      | (24:5)                  | C34H59NO9P |
| LPC(24:2)                                        | 662.4397              | 662.4410            | 1.9670      | (24:2)                  | C34H65NO9P |
| LPC(24:1)                                        | 664.4553              | 664.4560            | 0.9828      | (24:1)                  | C34H67NO9P |

| LPC(24:0)                                                   | 666.4710 | 666.4709 | -0.1455 | <i>a</i>                                                                                                                                             | C34H69NO9P  |
|-------------------------------------------------------------|----------|----------|---------|------------------------------------------------------------------------------------------------------------------------------------------------------|-------------|
| <b>PC identified as [M + CH<sub>3</sub>COO]<sup>-</sup></b> |          |          |         |                                                                                                                                                      |             |
| PC(P-28:0)/PC(O-28:1)                                       | 720.5179 | 720.5186 | 0.9063  | (P-14:0/14:0), (O-14:1/14:0)                                                                                                                         | C38H75NO9P  |
| PC(O-28:0)                                                  | 722.5336 | 722.5338 | 0.2810  | <i>b</i>                                                                                                                                             | C38H77NO9P  |
| PC(P-30:1)/PC(O-30:2)                                       | 746.5336 | 746.5336 | 0.0040  | (P-14:0/16:1), (P-16:1/14:0), (O-14:1/16:1)                                                                                                          | C40H77NO9P  |
| PC(29:1)                                                    | 748.5129 | 748.5128 | -0.0828 | (14:0_15:1)                                                                                                                                          | C39H75NO10P |
| PC(P-30:0)/PC(O-30:1)                                       | 748.5492 | 748.5504 | 1.5403  | (P-14:0/16:0), (P-16:0/14:0), (O-14:0/16:1), (O-14:1/16:0), (O-16:1/14:0)                                                                            | C40H79NO9P  |
| PC(29:0)                                                    | 750.5285 | 750.5291 | 0.7834  | (14:0/15:0)                                                                                                                                          | C39H77NO10P |
| PC(O-30:0)                                                  | 750.5649 | 750.565  | 0.1386  | (O-14:0/16:0), (O-16:0/14:0)                                                                                                                         | C40H81NO9P  |
| PC(30:1)                                                    | 762.5285 | 762.5275 | -1.3272 | <b>(14:0/16:1)</b> , (16:0/14:1)                                                                                                                     | C40H77NO10P |
| PC(30:0)                                                    | 764.5442 | 764.5445 | 0.4421  | (14:0_16:0)                                                                                                                                          | C40H79NO10P |
| PC(P-32:2)/PC(O-32:3)                                       | 772.5492 | 772.5497 | 0.5877  | <i>b</i>                                                                                                                                             | C42H79NO9P  |
| PC(31:2)                                                    | 774.5285 | 774.5296 | 1.4047  | (14:1/16:1)                                                                                                                                          | C41H77NO10P |
| PC(P-32:1)/PC(O-32:2)                                       | 774.5649 | 774.5665 | 2.0708  | (P-14:0/18:1), (P-16:0/16:1), (P-16:1/16:0), (P-18:1/14:0), (O-14:1/18:1), (O-16:1/16:1)                                                             | C42H81NO9P  |
| PC(31:1)                                                    | 776.5442 | 776.5448 | 0.8229  | (14:0_17:1), (15:0_16:1), <b>(15:1_16:0)</b>                                                                                                         | C41H79NO10P |
| PC(P-32:0)/PC(O-32:1)                                       | 776.5805 | 776.5813 | 0.9696  | (P-14:0/18:0), (P-16:0/16:0), (P-18:0/14:0), (O-14:0/18:1), (O-14:1/18:0), (O-16:0/16:1), (O-16:1/16:0), (O-18:1/14:0)                               | C42H83NO9P  |
| PC(31:0)                                                    | 778.5598 | 778.5599 | 0.1130  | (14:0_17:0), <b>(15:0/16:0)</b>                                                                                                                      | C41H81NO10P |
| PC(O-32:0)                                                  | 778.5962 | 778.5956 | -0.7668 | (O-16:0/16:0), (O-18:0/14:0)                                                                                                                         | C42H85NO9P  |
| PC(32:2)                                                    | 788.5442 | 788.5448 | 0.8091  | (14:0_18:2), (14:1/18:1), (16:0_16:2), <b>(16:1/16:1)</b>                                                                                            | C42H79NO10P |
| PC(32:1)                                                    | 790.5598 | 790.5604 | 0.7450  | <i>b</i>                                                                                                                                             | C42H81NO10P |
| PC(32:0)                                                    | 792.5755 | 792.575  | -0.5829 | (14:0/18:0), <b>(16:0/16:0)</b>                                                                                                                      | C42H83NO10P |
| PC(P-34:4)/PC(O-34:5)                                       | 796.5492 | 796.5495 | 0.3176  | <i>b</i>                                                                                                                                             | C44H79NO9P  |
| PC(33:4)                                                    | 798.5285 | 798.5282 | -0.3907 | <i>b</i>                                                                                                                                             | C43H77NO10P |
| PC(P-34:3)/PC(O-34:4)                                       | 798.5649 | 798.5648 | -0.1215 | <i>b</i>                                                                                                                                             | C44H81NO9P  |
| PC(33:3)                                                    | 800.5442 | 800.5443 | 0.1736  | (15:0/18:3), (16:1_17:2), (16:2_17:1)                                                                                                                | C43H79NO10P |
| PC(P-34:2)/PC(O-34:3)                                       | 800.5805 | 800.5804 | -0.1836 | (P-16:0/18:2), (P-16:1/18:1), (P-18:0/16:2), (P-18:1/16:1), (P-18:2/16:0), (O-16:0/18:3), (O-16:1/18:2), (O-16:2/18:1), (O-18:1/16:2), (O-18:2/16:1) | C44H83NO9P  |
| PC(33:2)                                                    | 802.5598 | 802.5607 | 1.1065  | (15:0_18:2), (16:2_17:1), <b>(16:1_17:2)</b>                                                                                                         | C43H81NO10P |
| PC(P-34:1)/PC(O-34:2)                                       | 802.5962 | 802.5979 | 2.1219  | (P-14:0/20:1), (P-16:0/18:1), (P-18:1/16:0), (P-18:0/16:1), (O-16:0/18:2), (O-16:1/18:1), (O-18:0/16:2), (O-18:1/16:1), (O-18:2/16:0)                | C44H85NO9P  |
| PC(33:1)                                                    | 804.5755 | 804.5754 | -0.0771 | (15:0_18:1), <b>(15:1/18:1)</b> , (16:0_17:1), (17:0/16:1)                                                                                           | C43H83NO10P |
| PC(P-34:0)/PC(O-34:1)                                       | 804.6118 | 804.613  | 1.4330  | (P-16:0/18:0), (P-18:0/16:0), (O-14:0/20:1), (O-16:0/18:1), (O-16:1/18:0), (O-18:0/16:1), (O-18:1/16:0)                                              | C44H87NO9P  |
| PC(33:0)                                                    | 806.5911 | 806.5915 | 0.4810  | (15:0_18:0), <b>(16:0_17:0)</b>                                                                                                                      | C43H85NO10P |
| PC(O-34:0)                                                  | 806.6275 | 806.6261 | -1.7307 | (O-20:0/14:0)                                                                                                                                        | C44H89NO9P  |
| PC(34:5)                                                    | 810.5285 | 810.5284 | -0.1382 | <b>(14:0/20:5)</b> , (14:1_20:4), (16:1_18:4)                                                                                                        | C44H77NO10P |
| PC(34:4)                                                    | 812.5442 | 812.5447 | 0.6621  | (14:0/20:4), <b>(16:0_18:4)</b> , (16:1_18:3)                                                                                                        | C44H79NO10P |
| PC(34:3)                                                    | 814.5598 | 814.5607 | 1.0914  | (14:0_20:3), (16:0_18:3), (16:1_18:2), (16:2_18:1), (16:3_18:0)                                                                                      | C44H81NO10P |
| PC(34:2)                                                    | 816.5755 | 816.5761 | 0.7813  | (16:0_18:2), <b>(16:1/18:1)</b> , (16:2_18:2)                                                                                                        | C44H83NO10P |
| PC(34:1)                                                    | 818.5911 | 818.5915 | 0.4740  | (14:0_20:1), <b>(16:0/18:1)</b> , <b>(16:2_18:0)</b>                                                                                                 | C44H85NO10P |
| PC(P-36:6)/PC(O-36:7)                                       | 820.5492 | 820.548  | -1.5185 | (P-14:0/22:6)                                                                                                                                        | C46H79NO9P  |
| PC(35:6)                                                    | 822.5285 | 822.5288 | 0.3501  | (15:1/20:5)                                                                                                                                          | C45H77NO10P |
| PC(P-36:5)/PC(O-36:6)                                       | 822.5649 | 822.5662 | 1.5841  | (P-14:0/22:5), (P-16:0/20:5), (O-14:0/22:6), (O-16:1/20:5)                                                                                           | C46H81NO9P  |
| PC(35:5)                                                    | 824.5442 | 824.5445 | 0.4111  | (15:0_20:5), <b>(15:1/20:4)</b>                                                                                                                      | C45H79NO10P |
| PC(P-36:4)/PC(O-36:5)                                       | 824.5805 | 824.5819 | 1.6408  | (P-16:0/20:4), (O-16:0/20:5), (O-16:1/20:4)                                                                                                          | C46H83NO9P  |
| PC(35:4)                                                    | 826.5598 | 826.5599 | 0.1065  | (15:0_20:4), (15:1_20:3), (17:1_18:3)                                                                                                                | C45H81NO10P |
| PC(P-36:3)/PC(O-36:4)                                       | 826.5962 | 826.596  | -0.2383 | (P-16:0/20:3), (P-18:1/18:2), (P-18:2/18:1), (O-16:0/20:4), (O-16:1/20:3), (O-18:2/18:2)                                                             | C46H85NO9P  |
| PC(35:3)                                                    | 828.5755 | 828.5764 | 1.1321  | (15:0_20:3), (17:0_18:3), (17:1/18:2), <b>(17:2/18:1)</b>                                                                                            | C45H83NO10P |
| PC(P-36:2)/PC(O-36:3)                                       | 828.6118 | 828.6114 | -0.5395 | (P-16:0/20:3), (P-18:0/18:2), (P-18:1/18:1), (O-16:0/20:3), (O-18:0/18:3), (O-18:1/18:2), (O-18:2/18:1)                                              | C46H87NO9P  |
| PC(35:2)                                                    | 830.5911 | 830.5916 | 0.5875  | (16:1_19:1), (17:0_18:2), <b>(17:1_18:1)</b> , (17:2_18:0)                                                                                           | C45H85NO10P |

|                        |          |          |         |                                                                                                                                                      |             |
|------------------------|----------|----------|---------|------------------------------------------------------------------------------------------------------------------------------------------------------|-------------|
| PC(P-36:1)/ PC(O-36:2) | 830.6275 | 830.6281 | 0.7272  | (P-14:0/22:1), (P-16:0/20:1), (P-18:0/18:1), (P-18:1/18:0), (P-20:0/16:1), (P-20:1/16:0), (O-16:1/20:1), (O-18:1/18:1), (P-20:1/16:1), (O-20:2/16:0) | C46H89NO9P  |
| PC(35:1)               | 832.6068 | 832.607  | 0.2858  | (16:0_19:1), (17:0_18:1), (17:1_18:0), <b>(17:2_18:1)</b>                                                                                            | C45H87NO10P |
| PC(P-36:0)/ PC(O-36:1) | 832.6431 | 832.6431 | -0.0564 | (P-18:0/18:0), (P-20:0/16:0), (O-14:0/22:1), (O-16:0/20:1), (O-18:0/18:1), (O-18:1/18:0), (O-20:0/16:1), (O-20:1/16:0)                               | C46H91NO9P  |
| PC(36:7)               | 834.5285 | 834.5289 | 0.4649  | <b>(14:1/22:6)</b> , (16:1_20:5)                                                                                                                     | C46H77NO10P |
| PC(35:0)               | 834.6224 | 834.6218 | -0.7321 | (16:0/19:0)                                                                                                                                          | C45H89NO10P |
| PC(36:6)               | 836.5442 | 836.5449 | 0.8822  | (14:0_22:6), (14:1_22:5), (16:1/20:5), (16:2_20:4),                                                                                                  | C46H79NO10P |
| PC(36:5)               | 838.5598 | 838.5614 | 1.8949  | <b>(16:0/20:5)</b> , (16:1_20:4)                                                                                                                     | C46H81NO10P |
| PC(36:4)               | 840.5755 | 840.5753 | -0.1927 | <i>b</i>                                                                                                                                             | C46H83NO10P |
| PC(36:3)               | 842.5911 | 842.5898 | -1.5571 | (16:0/20:3), (16:1_20:2), (18:0/18:3), <b>(18:1/18:2)</b>                                                                                            | C46H85NO10P |
| PC(36:2)               | 844.6068 | 844.6073 | 0.6370  | (16:0_20:2), (16:1_20:1), (18:0_18:2), <b>(18:1/18:1)</b>                                                                                            | C46H87NO10P |
| PC(36:1)               | 846.6224 | 846.6227 | 0.3402  | (14:0_22:1), (16:0_20:1), (16:1_20:0), <b>(18:0/18:1)</b>                                                                                            | C46H89NO10P |
| PC(P-38:6)/PC(O-38:7)  | 848.5805 | 848.5808 | 0.2981  | (P-16:0/22:6), (P-18:1/20:5), (P-18:2/20:4), (O-18:2/20:5), (O-18:3/20:4)                                                                            | C48H83NO9P  |
| PC(37:6)               | 850.5598 | 850.5609 | 1.2792  | (17:1/20:5)                                                                                                                                          | C47H81NO10P |
| PC(P-38:5)/PC(O-38:6)  | 850.5962 | 850.5965 | 0.3562  | (P-16:0/22:5), (P-18:0/20:5), (P-18:1/20:4), (O-16:0/22:6), (O-16:1/22:5), (O-18:1/20:5), (O-18:2/20:4)                                              | C48H85NO9P  |
| PC(37:5)               | 852.5755 | 852.5761 | 0.7483  | (15:0_22:5), (17:0/20:5), (17:1/20:4)                                                                                                                | C47H83NO10P |
| PC(P-38:4)/PC(O-38:5)  | 852.6118 | 852.6116 | -0.2897 | (P-16:0/22:4), (P-18:0/20:4), (O-16:0/22:5), (O-16:1/22:4), (O-18:0/20:5), (O-18:1/20:4)                                                             | C48H87NO9P  |
| PC(37:4)               | 854.5911 | 854.5915 | 0.4540  | <b>(17:0/20:4)</b> , (17:1_20:3)                                                                                                                     | C47H85NO10P |
| PC(P-38:3)/PC(O-38:4)  | 854.6275 | 854.6271 | -0.4634 | (P-18:0/20:3), (O-16:0/22:4), (O-16:1/22:3), (O-18:0/20:4), (O-18:1/20:3)                                                                            | C48H89NO9P  |
| PC(37:3)               | 856.6068 | 856.6062 | -0.6561 | (17:0/20:3), (17:1_20:2), (18:2_19:1)                                                                                                                | C47H87NO10P |
| PC(37:2)               | 858.6224 | 858.6218 | -0.7116 | (17:0_20:2), (17:1/20:1), (18:2_19:0), <b>(18:1_19:1)</b>                                                                                            | C47H89NO10P |
| PC(P-38:1)/PC(O-38:2)  | 858.6588 | 858.6592 | 0.4693  | (P-16:0/22:1), (P-18:0/20:1), (P-20:0/18:1), (O-16:0/22:2), (O-16:1/22:1), (O-18:0/20:2), (O-18:1/20:1), (O-20:1/18:1)                               | C48H93NO9P  |
| PC(38:8)               | 860.5442 | 860.5454 | 1.4386  | (16:2_22:6), (18:3_20:5)                                                                                                                             | C48H79NO10P |
| PC(37:1)               | 860.6381 | 860.6383 | 0.2765  | (17:0_20:1), (17:1/20:0), (18:0_19:1), <b>(19:0/18:1)</b>                                                                                            | C47H91NO10P |
| PC(38:7)               | 862.5598 | 862.5611 | 1.4944  | <b>(16:1_22:6)</b> , (18:2_20:5)                                                                                                                     | C48H81NO10P |
| PC(37:0)               | 862.6537 | 862.6534 | -0.3617 | <i>b</i>                                                                                                                                             | C47H93NO10P |
| PC(38:6)               | 864.5755 | 864.5768 | 1.5476  | <b>(16:0_22:6)</b> , (16:1_22:5), (18:1_20:5)                                                                                                        | C48H83NO10P |
| PC(38:5)               | 866.5911 | 866.5918 | 0.7939  | (16:0_22:5), <b>(18:0/20:5)</b> , (18:1/20:4)                                                                                                        | C48H85NO10P |
| PC(38:4)               | 868.6068 | 868.6055 | -1.4529 | (16:1_22:3), <b>(18:0_20:4)</b> , (18:1_20:3)                                                                                                        | C48H87NO10P |
| PC(38:3)               | 870.6224 | 870.6213 | -1.2772 | (16:0_22:3), <b>(18:0_20:3)</b> , (18:1_20:2), (18:2_20:1)                                                                                           | C48H89NO10P |
| PC(38:2)               | 872.6381 | 872.6371 | -1.1024 | (16:0_22:2), (16:1_22:1), (18:0_20:2), <b>(18:1_20:1)</b> , (18:2_20:0)                                                                              | C48H91NO10P |
| PC(38:1)               | 874.6537 | 874.6539 | 0.2149  | (16:0/22:1), (18:0_20:1), (18:1/20:0)                                                                                                                | C48H93NO10P |
| PC(39:6)               | 878.5911 | 878.5915 | 0.4416  | (17:0_22:6), (17:1_22:5)                                                                                                                             | C49H85NO10P |
| PC(P-40:5)/PC(O-40:6)  | 878.6275 | 878.6273 | -0.2231 | (P-18:0/22:5), (P-20:0/20:5), (P-20:1/20:4), (O-18:0/22:6), (O-18:1/22:5), (O-20:1/20:5), (O-20:2/20:4)                                              | C50H89NO9P  |
| PC(39:5)               | 880.6068 | 880.6066 | -0.1840 | <b>(17:0/22:5)</b> , (17:1_22:4), (19:0_20:5), (19:1_20:4)                                                                                           | C49H87NO10P |
| PC(P-40:4)/PC(O-40:5)  | 880.6431 | 880.6429 | -0.2805 | (P-18:0/22:4), (P-18:1/22:3), (P-20:0/20:5), (P-20:1/20:4), (O-16:0/24:5), (O-18:0/22:5), (O-18:1/22:4), (O-20:1/20:4)                               | C50H91NO9P  |
| PC(40:10)              | 884.5442 | 884.5443 | 0.1560  | <b>(20:5/20:5)</b> , (18:4_22:6)                                                                                                                     | C50H79NO10P |
| PC(40:9)               | 886.5598 | 886.5606 | 0.8900  | (18:3_22:6), <b>(20:3_20:4)</b>                                                                                                                      | C50H81NO10P |
| PC(39:2)               | 886.6537 | 886.6529 | -0.9158 | (17:1/22:1)                                                                                                                                          | C49H93NO10P |
| PC(40:8)               | 888.5754 | 888.5761 | 0.7743  | (18:2_22:6), <b>(20:4/20:4)</b>                                                                                                                      | C50H83NO10P |
| PC(39:1)               | 888.6694 | 888.6693 | -0.0698 | <i>b</i>                                                                                                                                             | C49H95NO10P |
| PC(40:7)               | 890.5911 | 890.5915 | 0.4357  | <b>(18:1_22:6)</b> , (20:2_20:5), (20:3_20:4)                                                                                                        | C50H85NO10P |
| PC(40:6)               | 892.6068 | 892.6077 | 1.0509  | <b>(18:0_22:6)</b> , (18:1_22:5), (20:1_20:5)                                                                                                        | C50H87NO10P |
| PC(40:5)               | 894.6224 | 894.6218 | -0.6841 | (18:0_22:5), <b>(18:1/22:4)</b>                                                                                                                      | C50H89NO10P |
| PC(40:4)               | 896.6381 | 896.6368 | -1.4075 | (18:0_22:4)                                                                                                                                          | C50H91NO10P |
| PC(40:3)               | 898.6537 | 898.6529 | -0.9036 | (18:0_22:3), (18:1_22:2), (18:2_22:1), (20:1_20:2)                                                                                                   | C50H93NO10P |
| PC(40:2)               | 900.6694 | 900.6685 | -0.9571 | (18:0_22:2), <b>(18:1_22:1)</b> , (20:1/20:1)                                                                                                        | C50H95NO10P |
| PC(P-42:7)/PC(O-42:8)  | 902.6275 | 902.6268 | -0.7722 | (P-20:1/22:6), (O-20:2/22:6)                                                                                                                         | C52H89NO9P  |

|                                            |          |          |         |                                                                                                         |             |
|--------------------------------------------|----------|----------|---------|---------------------------------------------------------------------------------------------------------|-------------|
| PC(40:1)                                   | 902.6850 | 902.685  | -0.0133 | (16:0_24:1), (16:1_24:1), (18:0_22:1)                                                                   | C50H97NO10P |
| PC(41:5)                                   | 908.6381 | 908.6372 | -0.9487 | (19:0/22:5)                                                                                             | C51H91NO10P |
| PC(42:11)                                  | 910.5598 | 910.5598 | -0.0121 | (20:5_22:6)                                                                                             | C52H81NO10P |
| PC(42:10)                                  | 912.5755 | 912.5757 | 0.2608  | (20:4_22:6)                                                                                             | C52H83NO10P |
| PC(42:8)                                   | 916.6068 | 916.6066 | -0.1767 | (20:2_22:6)                                                                                             | C52H87NO10P |
| PC(42:7)                                   | 918.6224 | 918.6223 | -0.1219 | (18:0_24:5), (20:1_22:6)                                                                                | C52H89NO10P |
| PC(42:6)                                   | 920.6381 | 920.6388 | 0.8016  | (18:1_24:5), (20:0_22:6), (20:1_22:5), (20:0_22:5), (20:5/22:1)                                         | C52H91NO10P |
| PC(42:5)                                   | 922.6537 | 922.6538 | 0.0954  | <i>b</i>                                                                                                | C52H93NO10P |
| PC(42:2)                                   | 928.7007 | 928.7005 | -0.1734 | (20:1/22:1)                                                                                             | C52H99NO10P |
| PC(44:10)                                  | 940.6068 | 940.6055 | -1.3417 | (22:5/22:5)                                                                                             | C54H87NO10P |
| PC(44:9)                                   | 942.6224 | 942.6232 | 0.8360  | <i>b</i>                                                                                                | C54H89NO10P |
| PC(44:6)                                   | 948.6694 | 948.6687 | -0.6978 | <i>b</i>                                                                                                | C54H95NO10P |
| PC(46:7)                                   | 974.6850 | 974.6857 | 0.7059  | (22:6_24:1)                                                                                             | C56H97NO10P |
| <b>LPE identified as [M-H]<sup>+</sup></b> |          |          |         |                                                                                                         |             |
| LPE(P-16:0)/LPE(O-16:1)                    | 436.2828 | 436.2836 | 1.8291  | (P-16:0)                                                                                                | C21H43NO6P  |
| LPE(O-16:0)                                | 438.2985 | 438.2987 | 0.5658  | <i>a</i>                                                                                                | C21H45NO6P  |
| LPE(16:1)                                  | 450.2621 | 450.2629 | 1.8500  | (16:1)                                                                                                  | C21H41NO7P  |
| LPE(16:0)                                  | 452.2777 | 452.2786 | 1.9523  | (16:0)                                                                                                  | C21H43NO7P  |
| LPE(P-18:1)/LPE(O-18:2)                    | 462.2985 | 462.2989 | 0.9691  | <i>a</i>                                                                                                | C23H45NO6P  |
| LPE(17:1)                                  | 464.2777 | 464.2782 | 1.0403  | (17:1)                                                                                                  | C22H43NO7P  |
| LPE(P-18:0)/LPE(O-18:1)                    | 464.3141 | 464.3148 | 1.5033  | (P-18:0)                                                                                                | C23H47NO6P  |
| LPE(17:0)                                  | 466.2934 | 466.2939 | 1.1431  | (17:0)                                                                                                  | C22H45NO7P  |
| LPE(O-18:0)                                | 466.3298 | 466.3301 | 0.7463  | <i>a</i>                                                                                                | C23H49NO6P  |
| LPE(18:2)                                  | 476.2777 | 476.2782 | 1.0141  | (18:2)                                                                                                  | C23H43NO7P  |
| LPE(18:1)                                  | 478.2934 | 478.2944 | 2.1598  | (18:1)                                                                                                  | C23H45NO7P  |
| LPE(18:0)                                  | 480.3090 | 480.3101 | 2.2548  | (18:0)                                                                                                  | C23H47NO7P  |
| LPE(20:5)                                  | 498.2621 | 498.2633 | 2.4746  | (20:5)                                                                                                  | C25H41NO7P  |
| LPE(20:4)                                  | 500.2777 | 500.2788 | 2.1648  | (20:4)                                                                                                  | C25H43NO7P  |
| LPE(20:1)                                  | 506.3247 | 506.3256 | 1.8427  | (20:1)                                                                                                  | C25H49NO7P  |
| LPE(22:6)                                  | 524.2777 | 524.2783 | 1.1139  | (22:6)                                                                                                  | C27H43NO7P  |
| LPE(22:5)                                  | 526.2934 | 526.2940 | 1.2028  | <i>b</i>                                                                                                | C27H45NO7P  |
| LPE(22:1)                                  | 534.3560 | 534.3569 | 1.7460  | (22:1)                                                                                                  | C27H53NO7P  |
| <b>PE identified as [M-H]<sup>+</sup></b>  |          |          |         |                                                                                                         |             |
| PE(P-32:1)/PE(O-32:2)                      | 672.4970 | 672.4983 | 1.9331  | (P-14:0/18:1), (P-16:0/16:1), (P-18:1/14:0), (O-14:1/18:1), (O-16:1/16:1)                               | C37H71NO7P  |
| PE(32:2)                                   | 686.4760 | 686.4754 | -0.8740 | <i>a</i>                                                                                                | C37H69O8NP  |
| PE(32:1)                                   | 688.4917 | 688.4922 | 0.7262  | <i>b</i>                                                                                                | C37H71NO8P  |
| PE(P-34:2)/PE(O-34:3)                      | 698.5130 | 698.5143 | 1.8611  | (P-16:0/18:2), (P-16:1/18:1), (P-18:1/16:1), (P-18:2/16:0), (O-16:1/18:2), (O-16:2/18:1), (O-18:2/16:1) | C39H73NO7P  |
| PE(P-34:1)/PE(O-34:2)                      | 700.5280 | 700.5288 | 1.1420  | <i>a</i>                                                                                                | C39H75NO7P  |
| PE(P-34:0)/PE(O-34:1)                      | 702.5440 | 702.5445 | 0.7117  | (P-18:0/16:0), (O-16:0/18:1), (O-18:0/16:1), (O-18:1/16:0)                                              | C39H77NO7P  |
| PE(34:3)                                   | 712.4920 | 712.4925 | 0.7018  | <i>a</i>                                                                                                | C39H71O8NP  |
| PE(34:2)                                   | 714.5070 | 714.5061 | -1.2596 | (16:1_18:1)                                                                                             | C39H73NO8P  |
| PE(34:1)                                   | 716.5230 | 716.5244 | 1.9539  | (16:0/18:1), (16:1_18:0)                                                                                | C39H75NO8P  |
| PE(P-36:6)/PE(O-36:7)                      | 718.4810 | 718.4819 | 1.2526  | (P-14:0/22:6)                                                                                           | C41H69O7NP  |
| PE(P-36:5)/PE(O-36:6)                      | 720.4970 | 720.4983 | 1.8043  | (P-14:0/22:5), (P-16:0/20:5), (O-14:0/22:6), (O-16:1/20:5)                                              | C41H71NO7P  |
| PE(P-36:4)/PE(O-36:5)                      | 722.5130 | 722.5136 | 0.8304  | <i>b</i>                                                                                                | C41H73NO7P  |
| PE(P-36:3)/PE(O-36:4)                      | 724.5281 | 724.5272 | -1.2422 | <i>a</i>                                                                                                | C41H75NO7P  |
| PE(P-36:2)/PE(O-36:3)                      | 726.5440 | 726.5450 | 1.3764  | (P-18:0/18:2), (P-18:1/18:1), (O-18:1/18:2), (O-18:2/18:1)                                              | C41H77NO7P  |

|                       |          |          |         |                                                                                                                                                      |            |
|-----------------------|----------|----------|---------|------------------------------------------------------------------------------------------------------------------------------------------------------|------------|
| PE(35:2)              | 728.5230 | 728.5245 | 2.0150  | (17:1/18:1)                                                                                                                                          | C40H75NO8P |
| PE(P-36:1)/PE(O-36:2) | 728.5590 | 728.5602 | 1.6471  | (P-14:0/22:1), (P-16:0/20:1), (P-18:0/18:1), (P-20:0/16:1), (O-16:1/20:1), (O-18:1/18:1), (P-20:1/16:1)                                              | C41H79NO7P |
| PE(35:1)              | 730.5387 | 730.5395 | 1.1197  | a                                                                                                                                                    | C40H77NO8P |
| PE(P-36:0)/PE(O-36:1) | 730.5750 | 730.5757 | 0.9581  | a                                                                                                                                                    | C41H81NO7P |
| PE(36:6)              | 734.4760 | 734.4774 | 1.9061  | a                                                                                                                                                    | C41H69NO8P |
| PE(36:5)              | 736.4917 | 736.4904 | -1.7651 | a                                                                                                                                                    | C41H71O8NP |
| PE(36:2)              | 742.5387 | 742.5391 | 0.5387  | (16:1_20:1), (18:0_18:2), (18:1/18:1)                                                                                                                | C41H77O8NP |
| PE(P-38:7)/PE(O-38:8) | 744.4968 | 744.4974 | 0.8059  | (O-16:0/22:6)                                                                                                                                        | C43H71O7NP |
| PE(P-38:6)/PE(O-38:7) | 746.5130 | 746.5143 | 1.7414  | (P-16:0/22:6), (P-16:1/22:5), (P-18:1/20:5), (O-16:1/22:6), (O-18:2/20:5)                                                                            | C43H73NO7P |
| PE(P-38:5)/PE(O-38:6) | 748.5281 | 748.5284 | 0.4008  | a                                                                                                                                                    | C43H75NO7P |
| PE(37:5)              | 750.5074 | 750.5069 | -0.6422 | b                                                                                                                                                    | C42H73O8NP |
| PE(P-38:4)/PE(O-38:5) | 750.5440 | 750.5436 | -0.5329 | b                                                                                                                                                    | C43H77NO7P |
| PE(37:4)              | 752.5230 | 752.5232 | 0.2232  | a                                                                                                                                                    | C42H75NO8P |
| PE(P-38:3)/PE(O-38:4) | 752.5590 | 752.5581 | -1.1959 | a                                                                                                                                                    | C43H79NO7P |
| PE(P-38:2)/PE(O-38:3) | 754.5751 | 754.5749 | -0.2650 | a                                                                                                                                                    | C43H81NO7P |
| PE(P-38:1)/PE(O-38:2) | 756.5910 | 756.5919 | 1.1895  | (P-16:0/22:1), (P-18:0/20:1), (P-20:0/18:1), (P-22:0/16:1), (O-16:1/22:1), (O-18:1/20:1), (O-20:1/18:1), (O-22:1/16:1),                              | C43H83NO7P |
| PE(38:8)*             | 758.4760 | 758.4768 | 1.0547  | b                                                                                                                                                    | C43H69NO8P |
| PE(P-38:0)/PE(O-38:1) | 758.6060 | 758.6063 | 0.3955  | b                                                                                                                                                    | C43H85NO7P |
| PE(38:7)              | 760.4920 | 760.4924 | 0.5260  | (16:1/22:6)                                                                                                                                          | C43H71NO8P |
| PE(38:6)              | 762.5074 | 762.5091 | 2.2295  | (16:0_22:6), (16:1_22:5), (18:1_20:5),                                                                                                               | C43H73O8NP |
| PE(38:5)              | 764.5230 | 764.5233 | 0.3924  | (16:0_22:5), (18:0_20:5), (18:1_20:4)                                                                                                                | C43H75NO8P |
| PE(38:4)              | 766.5390 | 766.5394 | 0.5218  | b                                                                                                                                                    | C43H77O8NP |
| PE(38:3)              | 768.5540 | 768.5526 | -1.8216 | b                                                                                                                                                    | C43H79NO8P |
| PE(P-40:8)/PE(O-40:9) | 770.5130 | 770.5138 | 1.0383  | (P-18:2/22:6), (O-18:3/22:6)                                                                                                                         | C45H73O7NP |
| PE(P-40:7)/PE(O-40:8) | 772.5280 | 772.5292 | 1.5533  | b                                                                                                                                                    | C45H75NO7P |
| PE(39:7)              | 774.5074 | 774.5076 | 0.2815  | (17:1_22:6)                                                                                                                                          | C44H73NO8P |
| PE(P-40:6)/PE(O-40:7) | 774.5440 | 774.5451 | 1.4202  | (P-18:0/22:6), (P-18:1/22:5), (O-18:1/22:6), (O-18:2/22:5)                                                                                           | C45H77NO7P |
| PE(39:6)              | 776.5230 | 776.5228 | -0.2988 | b                                                                                                                                                    | C44H75O8NP |
| PE(P-40:5)/PE(O-40:6) | 776.5594 | 776.5593 | -0.1288 | b                                                                                                                                                    | C45H79NO7P |
| PE(39:5)              | 778.5387 | 778.5381 | -0.7476 | a                                                                                                                                                    | C44H77NO8P |
| PE(P-40:4)/PE(O-40:5) | 778.5750 | 778.5742 | -1.0275 | a                                                                                                                                                    | C45H81NO7P |
| PE(P-40:3)/PE(O-40:4) | 780.5910 | 780.5902 | -1.0249 | a                                                                                                                                                    | C45H83NO7P |
| PE(P-40:2)/PE(O-40:3) | 782.6060 | 782.6069 | 1.1500  | a                                                                                                                                                    | C45H85NO7P |
| PE(40:9)              | 784.4917 | 784.4931 | 1.7846  | b                                                                                                                                                    | C45H71O8NP |
| PE(P-40:1)/PE(O-40:2) | 784.6220 | 784.6231 | 1.4019  | b                                                                                                                                                    | C45H87NO7P |
| PE(40:8)              | 786.5070 | 786.5081 | 1.3986  | b                                                                                                                                                    | C45H73O8NP |
| PE(40:7)              | 788.5230 | 788.5235 | 0.6341  | (18:1_22:6)                                                                                                                                          | C45H75NO8P |
| PE(40:6)              | 790.5300 | 790.5309 | 1.1385  | b                                                                                                                                                    | C45H77O8NP |
| PE(40:5)              | 792.5540 | 792.5532 | -1.0094 | (18:0_22:5)                                                                                                                                          | C45H79O8NP |
| PE(40:4)              | 794.5700 | 794.5699 | -0.1259 | b                                                                                                                                                    | C45H81NO8P |
| PE(P-42:8)/PE(O-42:9) | 798.5440 | 798.5434 | -0.7514 | (P-20:2/22:6), (O-20:3/22:6)                                                                                                                         | C47H77O7NP |
| PE(P-42:7)/PE(O-42:8) | 800.5594 | 800.5591 | -0.3747 | (P-20:1/22:6), (O-20:2/22:6)                                                                                                                         | C47H79O7NP |
| PE(41:7)              | 802.5387 | 802.5375 | -1.4728 | (19:1_22:6)                                                                                                                                          | C46H77NO8P |
| PE(P-42:6)/PE(O-42:7) | 802.5751 | 802.5766 | 1.8690  | (P-20:0/22:6), (P-20:1/22:5), (P-22:1/20:5), (O-20:1/22:6), (O-20:2/22:5), (O-22:2/20:5)                                                             | C47H81NO7P |
| PE(41:6)              | 804.5543 | 804.5540 | -0.4114 | (17:1_24:5), (19:1_22:5)                                                                                                                             | C46H79O8NP |
| PE(P-42:5)/PE(O-42:6) | 804.5910 | 804.5914 | 0.4971  | (P-18:0/24:5), (P-20:0/22:5), (P-20:1/22:4), (P-22:0/20:5), (P-22:1/20:4), (O-18:1/24:5), (O-20:0/22:6), (O-20:1/22:5), (O-22:1/20:5), (O-22:1/20:4) | C47H83O7NP |
| PE(P-42:4)/PE(O-42:5) | 806.6060 | 806.6063 | 0.3719  | a                                                                                                                                                    | C47H85NO7P |

|                                            |          |          |         |                                                                                                                        |            |
|--------------------------------------------|----------|----------|---------|------------------------------------------------------------------------------------------------------------------------|------------|
| PE(42:11)                                  | 808.4920 | 808.4921 | 0.1237  | <i>a</i>                                                                                                               | C47H71NO8P |
| PE(42:7)                                   | 816.5540 | 816.5547 | 0.8573  | <i>a</i>                                                                                                               | C47H79O8NP |
| PE(42:6)                                   | 818.5700 | 818.5702 | 0.2443  | (20:5_22:1)                                                                                                            | C47H81NO8P |
| PE(P-44:9)/PE(O-44:10)                     | 824.5590 | 824.5581 | -1.0915 | <i>a</i>                                                                                                               | C49H79O7NP |
| PE(P-44:7)/PE(O-44:8)                      | 828.5910 | 828.5914 | 0.4827  | (P-22:1/22:6), (P-22:2/22:5), (P-24:2/20:5), (O-22:2/22:6), (O-22:3/22:5), (O-24:3/20:5)                               | C49H83O7NP |
| PE(P-44:6)/PE(O-44:7)*                     | 830.6060 | 830.6055 | -0.6020 | (P-22:0/22:6), (P-22:1/22:5), (P-24:1/20:5), (P-24:2/20:4), (O-22:1/22:6), (O-22:2/22:5), (O-24:2/20:5), (O-24:3/20:4) | C49H85O7NP |
| <b>LPG identified as [M-H]<sup>+</sup></b> |          |          |         |                                                                                                                        |            |
| LPG(14:1)                                  | 453.2253 | 453.2255 | 0.3354  | <i>a</i>                                                                                                               | C20H38O9P  |
| LPG(14:0)                                  | 455.2410 | 455.2418 | 1.7617  | (14:0)                                                                                                                 | C20H40O9P  |
| LPG(16:1)                                  | 481.2566 | 481.2570 | 0.7314  | <i>a</i>                                                                                                               | C22H42O9P  |
| LPG(16:0)                                  | 483.2723 | 483.2727 | 0.8318  | (16:0)                                                                                                                 | C22H44O9P  |
| LPG(18:1)                                  | 509.2879 | 509.2885 | 1.0839  | (18:1)                                                                                                                 | C24H46O9P  |
| LPG(22:6)                                  | 555.2723 | 555.2712 | -1.9774 | (22:6)                                                                                                                 | C28H44O9P  |
| LPG(22:2)                                  | 563.3349 | 563.3353 | 0.7136  | <i>a</i>                                                                                                               | C28H52O9P  |
| LPG(22:1)                                  | 565.3505 | 565.3502 | -0.6155 | <i>a</i>                                                                                                               | C28H54O9P  |
| <b>PG identified as [M-H]<sup>+</sup></b>  |          |          |         |                                                                                                                        |            |
| PG(32:0)                                   | 721.5020 | 721.5028 | 1.1088  | <i>a</i>                                                                                                               | C38H74O10P |
| PG(32:1)                                   | 719.4863 | 719.4865 | 0.2780  | <i>a</i>                                                                                                               | C38H72O10P |
| PG(32:5)                                   | 711.4237 | 711.4240 | 0.4217  | <i>a</i>                                                                                                               | C38H64O10P |
| PG(34:1)                                   | 747.5176 | 747.5173 | -0.4013 | (14:0_20:1), (16:0_18:1)                                                                                               | C40H76O10P |
| PG(34:2)                                   | 745.5020 | 745.5021 | 0.1341  | (16:0_18:2), (16:1_18:1)                                                                                               | C40H74O10P |
| PG(34:3)                                   | 743.4863 | 743.4869 | 0.8070  | <i>a</i>                                                                                                               | C40H72O10P |
| PG(34:4)                                   | 741.4707 | 741.4719 | 1.6184  | <i>a</i>                                                                                                               | C40H70O10P |
| PG(34:5) <sup>§</sup>                      | 739.4550 | 739.4557 | 0.9466  | <i>a</i>                                                                                                               | C40H68O10P |
| PG(36:1)                                   | 775.5489 | 775.5495 | 0.7736  | (16:0_20:1), (18:0_18:1)                                                                                               | C42H80O10P |
| PG(36:2)                                   | 773.5333 | 773.5335 | 0.2586  | <i>a</i>                                                                                                               | C42H78O10P |
| PG(38:1)                                   | 803.5802 | 803.5815 | 1.6178  | <i>a</i>                                                                                                               | C44H84O10P |
| PG(38:5)                                   | 795.5176 | 795.5165 | -1.3827 | <i>a</i>                                                                                                               | C44H76O10P |
| PG(40:3)                                   | 827.5802 | 827.5813 | 1.3292  | <i>a</i>                                                                                                               | C46H84O10P |
| PG(44:12)                                  | 865.5020 | 865.5028 | 0.9243  | <i>a</i>                                                                                                               | C50H76O10P |
| <b>LPI identified as [M-H]<sup>+</sup></b> |          |          |         |                                                                                                                        |            |
| LPI(16:0)                                  | 571.2883 | 571.2893 | 1.6769  | <i>a</i>                                                                                                               | C25H48O12P |
| LPI(18:0)                                  | 599.3196 | 599.3191 | -0.9060 | (18:0)                                                                                                                 | C27H52O12P |
| <b>PI identified as [M-H]<sup>+</sup></b>  |          |          |         |                                                                                                                        |            |
| PI(30:2)                                   | 777.4554 | 777.4555 | 0.1286  | <i>a</i>                                                                                                               | C39H70O13P |
| PI(30:0)                                   | 781.4867 | 781.4864 | -0.3839 | <i>a</i>                                                                                                               | C39H74O13P |
| PI(34:2)                                   | 833.5180 | 833.5173 | -0.8398 | (16:1_18:1)                                                                                                            | C43H78O13P |
| PI(34:1)                                   | 835.5337 | 835.5324 | -1.5559 | (16:0_18:1), (16:1_18:0)                                                                                               | C43H80O13P |
| PI(36:5) <sup>#</sup>                      | 855.5024 | 855.5019 | -0.5845 | <i>a</i>                                                                                                               | C45H76O13P |
| PI(36:4)                                   | 857.5180 | 857.5175 | -0.5831 | <i>a</i>                                                                                                               | C45H78O13P |
| PI(36:3)*                                  | 859.5337 | 859.5328 | -1.0471 | <i>a</i>                                                                                                               | C45H80O13P |
| PI(38:6) <sup>#</sup>                      | 881.5180 | 881.5182 | 0.2269  | <i>a</i>                                                                                                               | C47H78O13P |
| PI(38:5)                                   | 883.5337 | 883.5344 | 0.7923  | (18:0_20:5), (18:1_20:4)                                                                                               | C47H80O13P |
| PI(38:4)                                   | 885.5493 | 885.5498 | 0.5646  | (18:0_20:4)                                                                                                            | C47H82O13P |
| PI(40:4)                                   | 913.5806 | 913.5814 | 0.8757  | <i>a</i>                                                                                                               | C49H86O13P |
| PI(40:3)                                   | 915.5963 | 915.5970 | 0.7645  | <i>a</i>                                                                                                               | C49H88O13P |

|                                                             |           |           |         |          |             |
|-------------------------------------------------------------|-----------|-----------|---------|----------|-------------|
| PI(42:6)                                                    | 937.5806  | 937.5810  | 0.4266  | <i>a</i> | C51H86O13P  |
| PI(48:10)                                                   | 1013.6119 | 1013.6121 | 0.1894  | <i>a</i> | C57H90O13P  |
| <b>PS identified as [M-H]<sup>-</sup></b>                   |           |           |         |          |             |
| PS(34:2)                                                    | 758.4972  | 758.4973  | 0.1318  | <i>a</i> | C40H73NO10P |
| PS(34:1)                                                    | 760.5129  | 760.5132  | 0.3945  | <i>a</i> | C40H75NO10P |
| PS(36:2)                                                    | 786.5285  | 786.5287  | 0.2543  | <i>a</i> | C42H77NO10P |
| <b>SM identified as [M + CH<sub>3</sub>COO]<sup>-</sup></b> |           |           |         |          |             |
| SM(d30:1)                                                   | 705.5183  | 705.5191  | 1.1608  | <i>b</i> | C37H74N2O8P |
| SM(d30:0)                                                   | 707.5339  | 707.5339  | -0.0438 | <i>b</i> | C37H76N2O8P |
| SM(d31:1)                                                   | 719.5339  | 719.5345  | 0.7922  | <i>b</i> | C38H76N2O8P |
| SM(d31:0)                                                   | 721.5496  | 721.5487  | -1.2210 | <i>b</i> | C38H78N2O8P |
| SM(d32:2)                                                   | 731.5339  | 731.5342  | 0.3677  | <i>b</i> | C39H76N2O8P |
| SM(d32:1)                                                   | 733.5496  | 733.5504  | 1.1165  | <i>b</i> | C39H78N2O8P |
| SM(d32:0)                                                   | 735.5652  | 735.5642  | -1.4016 | <i>b</i> | C39H80N2O8P |
| SM(d33:2)                                                   | 745.5496  | 745.5503  | 0.9644  | <i>b</i> | C40H78N2O8P |
| SM(d33:1)                                                   | 747.5652  | 747.5662  | 1.2962  | <i>b</i> | C40H80N2O8P |
| SM(d33:0)                                                   | 749.5809  | 749.5798  | -1.4421 | <i>b</i> | C40H82N2O8P |
| SM(d34:2)                                                   | 759.5652  | 759.5661  | 1.1441  | <i>b</i> | C41H80N2O8P |
| SM(d34:1)                                                   | 761.5809  | 761.5817  | 1.0754  | <i>b</i> | C41H82N2O8P |
| SM(d34:0)                                                   | 763.5965  | 763.5952  | -1.7431 | <i>b</i> | C41H84N2O8P |
| SM(d35:2)                                                   | 773.5809  | 773.5815  | 0.8002  | <i>b</i> | C42H82N2O8P |
| SM(d35:0)                                                   | 777.6122  | 777.6114  | -1.0044 | <i>b</i> | C42H86N2O8P |
| SM(d36:3)                                                   | 785.5809  | 785.5816  | 0.9152  | <i>b</i> | C43H82N2O8P |
| SM(d36:2)                                                   | 787.5965  | 787.5983  | 2.2461  | <i>b</i> | C43H84N2O8P |
| SM(d36:1)                                                   | 789.6122  | 789.6132  | 1.2905  | <i>b</i> | C43H86N2O8P |
| SM(d36:0)                                                   | 791.6278  | 791.6269  | -1.1761 | <i>b</i> | C43H88N2O8P |
| SM(d37:3)                                                   | 799.5965  | 799.5977  | 1.4620  | <i>b</i> | C44H84N2O8P |
| SM(d37:2)                                                   | 801.6122  | 801.6128  | 0.7722  | <i>b</i> | C44H86N2O8P |
| SM(d37:1)                                                   | 803.6278  | 803.6289  | 1.3302  | <i>b</i> | C44H88N2O8P |
| SM(d37:0)                                                   | 805.6435  | 805.6425  | -1.2177 | <i>b</i> | C44H90N2O8P |
| SM(d38:3)                                                   | 813.6122  | 813.6128  | 0.7608  | <i>b</i> | C45H86N2O8P |
| SM(d38:2)                                                   | 815.6278  | 815.6287  | 1.0654  | <i>b</i> | C45H88N2O8P |
| SM(d38:1)                                                   | 817.6435  | 817.6435  | 0.0232  | <i>b</i> | C45H90N2O8P |
| SM(d38:0)                                                   | 819.6591  | 819.6584  | -0.8918 | <i>b</i> | C45H92N2O8P |
| SM(d39:3)                                                   | 827.6278  | 827.6277  | -0.1583 | <i>b</i> | C46H88N2O8P |
| SM(d39:2)                                                   | 829.6435  | 829.6445  | 1.2282  | <i>b</i> | C46H90N2O8P |
| SM(d39:1)                                                   | 831.6591  | 831.6597  | 0.6842  | <i>b</i> | C46H92N2O8P |
| SM(d39:0)                                                   | 833.6748  | 833.6735  | -1.5354 | <i>b</i> | C46H94N2O8P |
| SM(d40:3)                                                   | 841.6435  | 841.6446  | 1.3295  | <i>b</i> | C47H90N2O8P |
| SM(d40:2)                                                   | 843.6591  | 843.6599  | 0.9115  | <i>b</i> | C47H92N2O8P |
| SM(d40:1)                                                   | 845.6748  | 845.6742  | -0.6870 | <i>b</i> | C47H94N2O8P |
| SM(d41:3)                                                   | 855.6591  | 855.6596  | 0.5481  | <i>b</i> | C48H92N2O8P |
| SM(d41:2)                                                   | 857.6748  | 857.6750  | 0.2565  | <i>b</i> | C48H94N2O8P |
| SM(d41:1)                                                   | 859.6904  | 859.6898  | -0.7340 | <i>b</i> | C48H96N2O8P |
| SM(d42:3)                                                   | 869.6748  | 869.6754  | 0.7118  | <i>b</i> | C49H94N2O8P |
| SM(d42:2)                                                   | 871.6904  | 871.6904  | -0.0356 | <i>b</i> | C49H96N2O8P |
| SM(d42:1)                                                   | 873.7061  | 873.7055  | -0.6650 | <i>b</i> | C49H98N2O8P |

|                                              |          |          |         |               |              |
|----------------------------------------------|----------|----------|---------|---------------|--------------|
| SM(d43:3)                                    | 883.6904 | 883.6909 | 0.5307  | <i>b</i>      | C50H96N2O8P  |
| SM(d43:2)                                    | 885.7061 | 885.7073 | 1.3763  | <i>b</i>      | C50H98N2O8P  |
| SM(d43:1)                                    | 887.7217 | 887.7203 | -1.6120 | <i>b</i>      | C50H100N2O8P |
| SM(d44:3)                                    | 897.7061 | 897.7059 | -0.2016 | <i>b</i>      | C51H98N2O8P  |
| SM(d44:2)                                    | 899.7217 | 899.7219 | 0.1878  | <i>b</i>      | C51H100N2O8P |
| <b>Cer identified as [M + H]<sup>+</sup></b> |          |          |         |               |              |
| Cer(d34:1)                                   | 538.5199 | 538.5206 | 1.2646  | (16:0/d180:1) | C34H68NO3    |
| Cer(d36:1)                                   | 566.5512 | 566.5518 | 1.0255  | <i>a</i>      | C36H72NO3    |

*a* : no MS/MS spectra; *b* : no information about FAs, just class reporter ions.

O: plasmanyl; P: plasmeryl.

**Bold** is used to highlight the major species (whenever possible to discern).

\* not present in FI; <sup>§</sup> not present in FM; <sup>#</sup> not present in MM



Supplementary Table II  
 Normalized peak areas for the lipid species detected by HILIC-MS/MS

| Experimental Group      | D1       | D2      | D3       | D4      | D5      | D6       | D7       | D8       | D9       | D10      | D11      | D12      | D13      | D14      | D15      | D16      | D17      | D18     | D19      | D20      | D21      | D22      | D23      |
|-------------------------|----------|---------|----------|---------|---------|----------|----------|----------|----------|----------|----------|----------|----------|----------|----------|----------|----------|---------|----------|----------|----------|----------|----------|
|                         | FI       | FI      | FI       | FM      | FM      | FM       | FM       | FM       | FM       | MI       | MI       | MI       | MI       | MI       | MI       | MM       | MM       | MM      | MM       | MM       | MM       | MM       | MM       |
| Cer(d34:1)              | 0.00000  | 0.00086 | 0.00110  | 0.00000 | 0.00000 | 0.00000  | 0.00000  | 0.00000  | 0.00000  | 0.00038  | 0.00345  | 0.00000  | 0.00038  | 0.00000  | 0.00000  | 0.00000  | 0.00232  | 0.00000 | 0.00000  | 0.00000  | 0.00000  | 0.00002  | 0.00000  |
| Cer(d36:1)              | 0.00000  | 0.00000 | 0.00057  | 0.00054 | 0.00061 | 0.00000  | 0.00000  | 0.00115  | 0.00000  | 0.00000  | 0.00135  | 0.00000  | 0.00000  | 0.00000  | 0.00000  | 0.00000  | 0.00744  | 0.00000 | 0.00000  | 0.00000  | 0.00000  | 0.00001  | 0.00000  |
| LPC(14:0)               | 0.33238  | 0.28116 | 0.32143  | 0.24715 | 0.29574 | 0.41521  | 0.40371  | 0.71982  | 0.33533  | 0.64440  | 0.42312  | 0.49162  | 0.42660  | 0.60484  | 0.45873  | 0.60184  | 0.75673  | 0.24325 | 0.65578  | 0.34169  | 0.26632  | 0.76347  | 0.69004  |
| LPC(14:1)               | 0.00045  | 0.00014 | 0.00040  | 0.00017 | 0.00000 | 0.00102  | 0.00058  | 0.00152  | 0.00015  | 0.00082  | 0.00000  | 0.00254  | 0.00012  | 0.00155  | 0.00000  | 0.00120  | 0.00080  | 0.00031 | 0.00132  | 0.00008  | 0.00050  | 0.00098  | 0.00180  |
| LPC(15:0)               | 0.38877  | 0.40649 | 0.41920  | 0.28053 | 0.31066 | 0.44755  | 0.45684  | 0.73518  | 0.33153  | 0.67378  | 0.51541  | 0.47774  | 0.45135  | 0.50669  | 0.45128  | 0.50609  | 0.69125  | 0.25819 | 0.59702  | 0.31431  | 0.26592  | 0.66209  | 0.59173  |
| LPC(15:1)               | 0.03101  | 0.02514 | 0.03269  | 0.01777 | 0.01918 | 0.03064  | 0.02785  | 0.06102  | 0.02207  | 0.04937  | 0.02724  | 0.03367  | 0.02989  | 0.04026  | 0.02108  | 0.03730  | 0.04258  | 0.01375 | 0.03623  | 0.02084  | 0.01583  | 0.04203  | 0.03788  |
| LPC(16:0)               | 8.42577  | 9.45514 | 8.96584  | 6.70532 | 7.83342 | 11.01310 | 11.69733 | 17.31277 | 8.80095  | 16.73894 | 13.26002 | 12.10275 | 12.55561 | 12.72177 | 13.01821 | 13.25421 | 18.41355 | 7.12460 | 15.51619 | 8.84581  | 8.19300  | 17.64865 | 16.93307 |
| LPC(16:1)               | 1.35238  | 1.05844 | 1.32265  | 0.74439 | 0.95191 | 1.61416  | 1.51577  | 2.19322  | 1.17445  | 2.71162  | 1.48914  | 1.65257  | 1.50760  | 2.02522  | 1.75290  | 2.36729  | 2.55459  | 0.94290 | 2.16363  | 1.43479  | 1.06412  | 2.73647  | 2.28568  |
| LPC(17:0)               | 0.63812  | 0.69652 | 0.57886  | 0.41681 | 0.52173 | 0.70990  | 0.81840  | 1.17956  | 0.51726  | 1.20871  | 0.82964  | 0.67009  | 0.81450  | 0.80803  | 0.88726  | 0.72319  | 0.95482  | 0.43271 | 0.87182  | 0.56254  | 0.50668  | 1.01521  | 0.88591  |
| LPC(17:1)               | 0.77803  | 0.71647 | 0.77418  | 0.44529 | 0.61324 | 0.74238  | 0.87420  | 1.26069  | 0.66043  | 1.27215  | 0.93057  | 0.64142  | 0.87612  | 0.87083  | 0.80576  | 1.04442  | 1.38215  | 0.42428 | 1.04847  | 0.62105  | 0.49564  | 1.30176  | 1.18746  |
| LPC(17:2)               | 0.04219  | 0.02764 | 0.02556  | 0.02438 | 0.02573 | 0.03013  | 0.02467  | 0.07126  | 0.01364  | 0.06536  | 0.04095  | 0.04411  | 0.05122  | 0.03655  | 0.05047  | 0.07189  | 0.09143  | 0.02898 | 0.07183  | 0.03949  | 0.01959  | 0.10129  | 0.07178  |
| LPC(18:0)               | 6.39190  | 8.33495 | 5.78541  | 4.56082 | 5.42150 | 7.02026  | 8.35854  | 12.51858 | 5.74679  | 11.86963 | 8.74510  | 8.23783  | 10.23831 | 9.65252  | 9.71430  | 7.25110  | 8.71541  | 5.18273 | 7.58406  | 6.97253  | 5.88138  | 11.34267 | 9.93877  |
| LPC(18:1)               | 12.06614 | 9.56506 | 12.48693 | 7.11211 | 8.07232 | 12.93793 | 14.53001 | 19.59673 | 10.45255 | 22.08251 | 15.06997 | 13.58974 | 13.33637 | 18.56362 | 13.86657 | 18.21973 | 24.48213 | 8.54952 | 17.85642 | 12.87365 | 10.30075 | 22.97863 | 21.17543 |
| LPC(18:2)               | 0.53862  | 0.46175 | 0.47243  | 0.26617 | 0.25187 | 0.58865  | 0.50218  | 0.75359  | 0.32528  | 0.88316  | 0.57076  | 0.49922  | 0.50837  | 0.79567  | 0.52891  | 0.86095  | 0.92037  | 0.36796 | 0.77429  | 0.58055  | 0.40002  | 1.17024  | 0.84230  |
| LPC(18:3)               | 0.07073  | 0.05372 | 0.03750  | 0.03193 | 0.03125 | 0.06781  | 0.04421  | 0.07722  | 0.03624  | 0.07759  | 0.05535  | 0.04718  | 0.06156  | 0.09761  | 0.05643  | 0.10515  | 0.11243  | 0.03131 | 0.08943  | 0.05463  | 0.03519  | 0.12583  | 0.09860  |
| LPC(18:4)               | 0.02554  | 0.01351 | 0.01044  | 0.01390 | 0.01165 | 0.01861  | 0.01449  | 0.03792  | 0.01356  | 0.02777  | 0.01977  | 0.01589  | 0.03408  | 0.04659  | 0.02453  | 0.05963  | 0.06602  | 0.01102 | 0.04620  | 0.02463  | 0.00925  | 0.05889  | 0.03722  |
| LPC(19:1)               | 0.10292  | 0.09392 | 0.10907  | 0.06954 | 0.08440 | 0.10238  | 0.13127  | 0.17420  | 0.09759  | 0.18024  | 0.12594  | 0.10768  | 0.12670  | 0.14204  | 0.11635  | 0.12980  | 0.18259  | 0.06598 | 0.13264  | 0.09186  | 0.08338  | 0.16938  | 0.16422  |
| LPC(19:2)               | 0.01543  | 0.01197 | 0.01731  | 0.00874 | 0.00913 | 0.01350  | 0.01802  | 0.02081  | 0.01225  | 0.02974  | 0.01780  | 0.01596  | 0.01641  | 0.01879  | 0.01245  | 0.02712  | 0.03067  | 0.01022 | 0.02671  | 0.01369  | 0.01560  | 0.02843  | 0.02665  |
| LPC(20:0)               | 0.05985  | 0.05193 | 0.05797  | 0.04081 | 0.04964 | 0.05281  | 0.07328  | 0.10254  | 0.05934  | 0.14529  | 0.08374  | 0.07530  | 0.07668  | 0.06828  | 0.08994  | 0.06108  | 0.07664  | 0.04498 | 0.08033  | 0.04421  | 0.04416  | 0.08211  | 0.08600  |
| LPC(20:1)               | 0.89743  | 0.71114 | 0.93205  | 0.61083 | 0.74232 | 1.10329  | 1.18291  | 1.32536  | 1.01380  | 1.79211  | 1.12291  | 0.92900  | 1.06230  | 1.30679  | 1.11550  | 1.24293  | 1.65945  | 0.62360 | 1.08855  | 0.95373  | 0.93856  | 1.59252  | 1.66688  |
| LPC(20:2)               | 0.04643  | 0.04627 | 0.04177  | 0.02370 | 0.03219 | 0.04944  | 0.06647  | 0.05982  | 0.03637  | 0.07385  | 0.06453  | 0.03731  | 0.04849  | 0.04918  | 0.03980  | 0.06630  | 0.08934  | 0.03086 | 0.07309  | 0.04224  | 0.02972  | 0.08969  | 0.08347  |
| LPC(20:3)               | 0.05535  | 0.05103 | 0.04762  | 0.03067 | 0.03259 | 0.06695  | 0.07325  | 0.08748  | 0.04007  | 0.11195  | 0.06857  | 0.04149  | 0.06179  | 0.06834  | 0.06182  | 0.11104  | 0.13400  | 0.04390 | 0.11976  | 0.07818  | 0.04141  | 0.18336  | 0.09150  |
| LPC(20:4)               | 0.78238  | 0.62508 | 0.45569  | 0.37975 | 0.38101 | 0.70804  | 0.64031  | 1.12223  | 0.39847  | 1.23760  | 0.81246  | 0.62552  | 0.72571  | 0.94787  | 0.84636  | 1.70547  | 1.67211  | 0.63505 | 1.44843  | 1.13052  | 0.52190  | 2.73815  | 1.38047  |
| LPC(20:5)               | 1.48704  | 1.21030 | 0.70446  | 0.83828 | 0.70236 | 1.30113  | 0.72701  | 1.94468  | 0.68876  | 2.13617  | 1.30077  | 1.38878  | 1.30573  | 2.04802  | 1.64297  | 2.47023  | 2.70022  | 1.08347 | 2.36429  | 1.45285  | 0.71152  | 3.30396  | 2.35608  |
| LPC(21:0)               | 0.00594  | 0.00540 | 0.00648  | 0.00366 | 0.00367 | 0.00395  | 0.00407  | 0.00612  | 0.00324  | 0.00859  | 0.00624  | 0.00547  | 0.00506  | 0.00378  | 0.00374  | 0.00512  | 0.00676  | 0.00608 | 0.00600  | 0.00592  | 0.00463  | 0.00591  | 0.00681  |
| LPC(21:1)               | 0.02239  | 0.01657 | 0.02936  | 0.01432 | 0.01836 | 0.02007  | 0.02073  | 0.03187  | 0.01904  | 0.03596  | 0.02804  | 0.02094  | 0.02598  | 0.03184  | 0.01408  | 0.01685  | 0.02894  | 0.01286 | 0.02035  | 0.01495  | 0.01654  | 0.02741  | 0.03611  |
| LPC(22:1)               | 0.65441  | 0.52090 | 0.88047  | 0.55800 | 0.65256 | 0.70781  | 0.70940  | 0.99067  | 0.76581  | 1.32233  | 1.00646  | 0.83187  | 0.99066  | 1.24785  | 0.74727  | 0.65741  | 1.11731  | 0.54183 | 0.76915  | 0.59877  | 0.69599  | 1.11233  | 1.40120  |
| LPC(22:2)               | 0.00632  | 0.00538 | 0.00632  | 0.00310 | 0.00410 | 0.00548  | 0.00623  | 0.00852  | 0.00551  | 0.01469  | 0.00929  | 0.00585  | 0.00947  | 0.00844  | 0.00455  | 0.00997  | 0.01201  | 0.00541 | 0.01097  | 0.00687  | 0.00461  | 0.01376  | 0.01471  |
| LPC(22:4)               | 0.02040  | 0.01407 | 0.00863  | 0.00844 | 0.00929 | 0.01328  | 0.01900  | 0.01963  | 0.01038  | 0.03541  | 0.02099  | 0.01648  | 0.01625  | 0.02074  | 0.01640  | 0.03557  | 0.04623  | 0.01172 | 0.04621  | 0.01654  | 0.01393  | 0.07056  | 0.02915  |
| LPC(22:5)               | 0.24314  | 0.16323 | 0.10671  | 0.11493 | 0.13103 | 0.21860  | 0.20393  | 0.30888  | 0.12254  | 0.42899  | 0.25743  | 0.19656  | 0.21725  | 0.29367  | 0.25883  | 0.51254  | 0.68727  | 0.18587 | 0.69580  | 0.26955  | 0.19980  | 0.84437  | 0.39448  |
| LPC(22:6)               | 1.33769  | 1.11737 | 0.45964  | 0.63409 | 0.80753 | 1.58923  | 1.09992  | 1.88546  | 0.66213  | 2.11856  | 1.50776  | 1.13257  | 1.26351  | 1.62167  | 1.44363  | 2.34610  | 3.56995  | 1.51022 | 3.31859  | 1.76559  | 1.05708  | 4.58314  | 2.74704  |
| LPC(24:0)               | 0.00470  | 0.00469 | 0.00991  | 0.00709 | 0.00588 | 0.00610  | 0.00780  | 0.01943  | 0.00456  | 0.01499  | 0.00927  | 0.01374  | 0.01509  | 0.00678  | 0.01570  | 0.00725  | 0.01120  | 0.01056 | 0.01264  | 0.00937  | 0.00553  | 0.01230  | 0.01213  |
| LPC(24:1)               | 0.05579  | 0.05250 | 0.08968  | 0.06402 | 0.06972 | 0.06804  | 0.06718  | 0.13518  | 0.05948  | 0.12539  | 0.09291  | 0.10136  | 0.12198  | 0.08643  | 0.10349  | 0.06870  | 0.12209  | 0.06927 | 0.10357  | 0.06521  | 0.05385  | 0.09613  | 0.11057  |
| LPC(24:2)               | 0.00216  | 0.00126 | 0.00337  | 0.00156 | 0.00166 | 0.00251  | 0.00260  | 0.00556  | 0.00236  | 0.00405  | 0.00403  | 0.00245  | 0.00499  | 0.00547  | 0.00030  | 0.00416  | 0.00655  | 0.00197 | 0.00414  | 0.00334  | 0.00170  | 0.00579  | 0.00637  |
| LPC(24:5)               | 0.00516  | 0.00245 | 0.00240  | 0.00284 | 0.00258 | 0.00299  | 0.00393  | 0.00611  | 0.00397  | 0.01192  | 0.00492  | 0.00575  | 0.00818  | 0.00714  | 0.00413  | 0.01406  | 0.01722  | 0.00480 | 0.01357  | 0.00477  | 0.00445  | 0.02357  | 0.01791  |
| LPC(24:6)               | 0.00577  | 0.00414 | 0.00055  | 0.00233 | 0.00118 | 0.00426  | 0.00293  | 0.00484  | 0.00139  | 0.01013  | 0.00558  | 0.00532  | 0.00553  | 0.00703  | 0.00382  | 0.01471  | 0.01843  | 0.00422 | 0.01507  | 0.00426  | 0.00339  | 0.01921  | 0.01254  |
| LPC(O-14:0)             | 0.00630  | 0.00701 | 0.00925  | 0.00564 | 0.01197 | 0.00492  | 0.01061  | 0.01917  | 0.00806  | 0.04136  | 0.01524  | 0.03900  | 0.01449  | 0.01577  | 0.00796  | 0.01099  | 0.01673  | 0.01341 | 0.01371  | 0.00502  | 0.00597  | 0.02071  | 0.02159  |
| LPC(O-16:0)             | 0.07842  | 0.09659 | 0.09451  | 0.07965 | 0.07912 | 0.08478  | 0.09902  | 0.15814  | 0.07177  | 0.29579  | 0.13990  | 0.32438  | 0.13122  | 0.13270  | 0.11309  | 0.08736  | 0.13718  | 0.11247 | 0.12101  | 0.07926  | 0.09440  | 0.17202  | 0.16762  |
| LPC(O-18:0)             | 0.02187  | 0.03368 | 0.02062  | 0.02076 | 0.01755 | 0.02883  | 0.03224  | 0.04250  | 0.01707  | 0.07363  | 0.04073  | 0.09130  | 0.04728  | 0.03825  | 0.03315  | 0.02153  | 0.03624  | 0.04111 | 0.03067  | 0.03642  | 0.03414  | 0.05408  | 0.04228  |
| LPC(O-20:0)             | 0.00111  | 0.00162 | 0.00154  | 0.00155 | 0.00083 | 0.00199  | 0.00221  | 0.00355  | 0.00146  | 0.00683  | 0.00288  | 0.00967  | 0.00227  | 0.00191  | 0.00258  | 0.00087  | 0.00135  | 0.00362 | 0.00223  | 0.00234  | 0.00268  | 0.00347  | 0.00269  |
| LPC(P-16:0)/LPC(O-16:1) | 0.10286  | 0.11373 | 0.11145  | 0.08950 | 0.09102 | 0.09797  | 0.10661  | 0.17852  | 0.08577  | 0.38805  | 0.16367  | 0.35114  | 0.12543  | 0.13567  | 0.1      |          |          |         |          |          |          |          |          |

|                         |          |          |          |          |          |          |          |          |          |          |          |          |          |          |          |          |          |          |          |          |          |          |          |
|-------------------------|----------|----------|----------|----------|----------|----------|----------|----------|----------|----------|----------|----------|----------|----------|----------|----------|----------|----------|----------|----------|----------|----------|----------|
| LPE(22:5)               | 0.01174  | 0.00748  | 0.00288  | 0.00488  | 0.00262  | 0.00604  | 0.00267  | 0.01681  | 0.00000  | 0.02223  | 0.00765  | 0.00972  | 0.00856  | 0.01601  | 0.01440  | 0.02417  | 0.02334  | 0.00940  | 0.04556  | 0.01337  | 0.00388  | 0.05110  | 0.01790  |
| LPE(22:6)               | 0.17473  | 0.15349  | 0.04769  | 0.08273  | 0.07208  | 0.14648  | 0.05956  | 0.27609  | 0.02034  | 0.25456  | 0.15540  | 0.17722  | 0.13909  | 0.24506  | 0.23980  | 0.27532  | 0.32970  | 0.24120  | 0.52778  | 0.24028  | 0.08334  | 0.64071  | 0.33401  |
| LPE(O-16:0)             | 0.00077  | 0.00121  | 0.00045  | 0.00019  | 0.00108  | 0.00094  | 0.00151  | 0.00359  | 0.00062  | 0.00739  | 0.00279  | 0.00943  | 0.00250  | 0.00217  | 0.00450  | 0.00159  | 0.00086  | 0.00320  | 0.00289  | 0.00138  | 0.00036  | 0.00555  | 0.00546  |
| LPE(O-18:0)             | 0.00134  | 0.00162  | 0.00044  | 0.00116  | 0.00077  | 0.00161  | 0.00032  | 0.00423  | 0.00030  | 0.00790  | 0.00436  | 0.01245  | 0.00240  | 0.00243  | 0.00610  | 0.00114  | 0.00042  | 0.00505  | 0.00358  | 0.00211  | 0.00134  | 0.00559  | 0.00408  |
| LPE(P-16:0)/LPE(O-16:1) | 0.00538  | 0.00524  | 0.00358  | 0.00391  | 0.00350  | 0.00704  | 0.00322  | 0.01180  | 0.00046  | 0.02183  | 0.00874  | 0.02150  | 0.00557  | 0.00688  | 0.01277  | 0.00712  | 0.00896  | 0.00953  | 0.01140  | 0.00389  | 0.00408  | 0.01195  | 0.01052  |
| LPE(P-18:0)/LPE(O-18:1) | 0.00849  | 0.01032  | 0.00656  | 0.00570  | 0.00447  | 0.00850  | 0.00618  | 0.01823  | 0.00059  | 0.02701  | 0.01186  | 0.02935  | 0.01118  | 0.01114  | 0.01765  | 0.01264  | 0.01231  | 0.01711  | 0.01166  | 0.00936  | 0.00684  | 0.01956  | 0.01280  |
| LPE(P-18:1)/LPE(O-18:2) | 0.00191  | 0.00118  | 0.00092  | 0.00079  | 0.00092  | 0.00228  | 0.00011  | 0.00344  | 0.00000  | 0.01009  | 0.00306  | 0.01068  | 0.00182  | 0.00172  | 0.00483  | 0.00263  | 0.00341  | 0.00337  | 0.00371  | 0.00070  | 0.00069  | 0.00444  | 0.00450  |
| LPG(14:0)               | 0.00517  | 0.00622  | 0.00310  | 0.00385  | 0.00299  | 0.00582  | 0.00564  | 0.01114  | 0.00438  | 0.01110  | 0.00873  | 0.00855  | 0.00420  | 0.00637  | 0.00395  | 0.01281  | 0.01354  | 0.00771  | 0.01481  | 0.00614  | 0.00649  | 0.01838  | 0.01152  |
| LPG(14:1)               | 0.00011  | 0.00071  | 0.00000  | 0.00002  | 0.00000  | 0.00045  | 0.00037  | 0.00097  | 0.00024  | 0.00157  | 0.00079  | 0.00046  | 0.00021  | 0.00029  | 0.00016  | 0.00096  | 0.00043  | 0.00052  | 0.00058  | 0.00024  | 0.00077  | 0.00630  | 0.00166  |
| LPG(16:0)               | 0.00029  | 0.00203  | 0.00131  | 0.00020  | 0.00048  | 0.00115  | 0.00128  | 0.00496  | 0.00086  | 0.00600  | 0.00271  | 0.00718  | 0.00052  | 0.00181  | 0.00225  | 0.00272  | 0.00356  | 0.00226  | 0.00647  | 0.00038  | 0.00094  | 0.00381  | 0.00335  |
| LPG(16:1)               | 0.00205  | 0.00402  | 0.00068  | 0.00014  | 0.00000  | 0.00263  | 0.00335  | 0.00347  | 0.00187  | 0.00439  | 0.00465  | 0.00202  | 0.00339  | 0.00456  | 0.00044  | 0.00105  | 0.00129  | 0.00136  | 0.00241  | 0.00336  | 0.00101  | 0.00227  | 0.00130  |
| LPG(18:1)               | 0.00401  | 0.00751  | 0.00896  | 0.00291  | 0.00322  | 0.00671  | 0.01137  | 0.01789  | 0.00824  | 0.02039  | 0.01175  | 0.00772  | 0.00789  | 0.02241  | 0.01158  | 0.00433  | 0.00854  | 0.00901  | 0.01362  | 0.00867  | 0.00553  | 0.01177  | 0.00778  |
| LPG(22:1)               | 0.00173  | 0.00061  | 0.00000  | 0.00262  | 0.00000  | 0.00000  | 0.00014  | 0.00218  | 0.00049  | 0.00000  | 0.00000  | 0.00093  | 0.00000  | 0.00163  | 0.00026  | 0.00437  | 0.00609  | 0.00109  | 0.00145  | 0.00024  | 0.00000  | 0.00307  | 0.00373  |
| LPG(22:2)               | 0.00357  | 0.00335  | 0.00143  | 0.00192  | 0.00118  | 0.00448  | 0.00632  | 0.00573  | 0.00380  | 0.00801  | 0.00823  | 0.00626  | 0.00190  | 0.00458  | 0.00262  | 0.00498  | 0.00652  | 0.00397  | 0.00599  | 0.00509  | 0.00240  | 0.00845  | 0.00771  |
| LPG(22:6)               | 0.00168  | 0.00186  | 0.00032  | 0.00036  | 0.00077  | 0.00240  | 0.00273  | 0.00409  | 0.00186  | 0.00766  | 0.00324  | 0.00510  | 0.00113  | 0.00324  | 0.00376  | 0.00251  | 0.00119  | 0.00462  | 0.00671  | 0.00160  | 0.00102  | 0.00191  | 0.00308  |
| LPI(16:0)               | 0.00540  | 0.00510  | 0.00490  | 0.00470  | 0.00497  | 0.00556  | 0.00592  | 0.00552  | 0.00562  | 0.00583  | 0.00488  | 0.00530  | 0.00488  | 0.00517  | 0.00510  | 0.00517  | 0.00634  | 0.00580  | 0.00755  | 0.00506  | 0.00529  | 0.00807  | 0.00688  |
| LPI(18:0)               | 0.00022  | 0.00014  | 0.00024  | 0.00033  | 0.00002  | 0.00200  | 0.00008  | 0.00180  | 0.00007  | 0.00078  | 0.00015  | 0.00016  | 0.00000  | 0.00023  | 0.00003  | 0.00007  | 0.00281  | 0.00178  | 0.00037  | 0.00009  | 0.00003  | 0.00399  | 0.00107  |
| PC(29:0)                | 0.03698  | 0.04057  | 0.03773  | 0.02183  | 0.02057  | 0.03902  | 0.02905  | 0.06314  | 0.02446  | 0.08301  | 0.07498  | 0.05280  | 0.02931  | 0.05035  | 0.05675  | 0.03139  | 0.02167  | 0.03576  | 0.02986  | 0.04127  | 0.01980  | 0.04004  | 0.03012  |
| PC(29:1)                | 0.00601  | 0.00757  | 0.00200  | 0.00000  | 0.00000  | 0.00323  | 0.00230  | 0.00851  | 0.00055  | 0.00309  | 0.00139  | 0.00419  | 0.00000  | 0.00776  | 0.00195  | 0.00603  | 0.00000  | 0.01040  | 0.00209  | 0.00291  | 0.00257  | 0.00521  | 0.00658  |
| PC(30:0)                | 0.55041  | 0.62835  | 0.65892  | 0.44771  | 0.45731  | 0.66679  | 0.44655  | 0.86315  | 0.39602  | 0.93467  | 1.33541  | 1.04014  | 0.94895  | 0.65819  | 0.84146  | 0.38963  | 0.31738  | 0.53706  | 0.37307  | 0.62962  | 0.26495  | 0.58096  | 0.46269  |
| PC(30:1)                | 0.57419  | 0.64758  | 0.43293  | 0.41045  | 0.45902  | 0.55419  | 0.46702  | 0.69027  | 0.42533  | 0.57769  | 0.69887  | 0.37621  | 0.42266  | 0.55812  | 0.52671  | 0.30369  | 0.23503  | 0.27624  | 0.28171  | 0.37740  | 0.27564  | 0.33106  | 0.26594  |
| PC(31:0)                | 0.26437  | 0.33059  | 0.27932  | 0.18635  | 0.19762  | 0.22557  | 0.16634  | 0.39010  | 0.14326  | 0.34516  | 0.50462  | 0.45787  | 0.19295  | 0.24960  | 0.27244  | 0.11720  | 0.12633  | 0.18201  | 0.10956  | 0.18723  | 0.09274  | 0.18218  | 0.15974  |
| PC(31:1)                | 0.40504  | 0.53359  | 0.29698  | 0.17230  | 0.19695  | 0.32632  | 0.25097  | 0.62957  | 0.17919  | 0.40048  | 0.64453  | 0.26432  | 0.29550  | 0.31231  | 0.29140  | 0.16318  | 0.11731  | 0.17590  | 0.13899  | 0.24093  | 0.11464  | 0.21580  | 0.15754  |
| PC(31:2)                | 0.05971  | 0.06921  | 0.02359  | 0.00865  | 0.01094  | 0.03176  | 0.02410  | 0.06421  | 0.01521  | 0.05290  | 0.06210  | 0.02504  | 0.02556  | 0.02684  | 0.03368  | 0.02252  | 0.01137  | 0.02171  | 0.00761  | 0.02716  | 0.01112  | 0.02525  | 0.01419  |
| PC(32:0)                | 1.46687  | 1.86411  | 1.52538  | 1.36754  | 1.35541  | 1.24880  | 0.94631  | 2.10906  | 0.85695  | 1.50521  | 2.65716  | 2.89369  | 1.29454  | 1.51009  | 1.47222  | 0.48599  | 0.53224  | 0.86743  | 0.53788  | 0.92454  | 0.46857  | 0.89879  | 0.84043  |
| PC(32:1)                | 6.39215  | 7.86743  | 4.89587  | 2.91918  | 3.06065  | 4.73461  | 3.72522  | 9.06427  | 3.05413  | 6.01776  | 9.10673  | 5.53997  | 4.99888  | 5.63363  | 4.93440  | 2.18421  | 1.87337  | 2.71236  | 2.20533  | 3.61137  | 2.27591  | 3.09807  | 2.72530  |
| PC(32:2)                | 1.09139  | 1.26082  | 0.56237  | 0.32817  | 0.35766  | 0.82635  | 0.62497  | 1.50175  | 0.45119  | 0.77067  | 1.16120  | 0.47089  | 0.76849  | 0.98319  | 0.60295  | 0.43006  | 0.28711  | 0.32962  | 0.39375  | 0.57044  | 0.36595  | 0.52987  | 0.37484  |
| PC(33:0)                | 0.48042  | 0.62537  | 0.52417  | 0.41588  | 0.62540  | 0.58178  | 0.45382  | 0.76858  | 0.41477  | 0.91478  | 0.83875  | 1.02519  | 0.50788  | 0.68577  | 0.50412  | 0.25739  | 0.41952  | 0.49486  | 0.32329  | 0.31964  | 0.24449  | 0.46184  | 0.47038  |
| PC(33:1)                | 1.98289  | 2.39165  | 1.67450  | 1.16945  | 1.48201  | 1.73809  | 1.45971  | 2.91827  | 1.15132  | 1.61323  | 2.89722  | 1.79341  | 1.78899  | 1.90915  | 1.34034  | 0.69684  | 0.75284  | 0.93776  | 0.87738  | 1.03438  | 0.76186  | 1.07242  | 1.01859  |
| PC(33:2)                | 1.01789  | 1.15299  | 0.57336  | 0.37307  | 0.50138  | 0.83436  | 0.73416  | 1.52784  | 0.57750  | 0.81653  | 1.27539  | 0.40032  | 0.89197  | 0.77851  | 0.61839  | 0.48159  | 0.32283  | 0.34862  | 0.50755  | 0.53745  | 0.33652  | 0.60352  | 0.40386  |
| PC(33:3)                | 0.12866  | 0.15087  | 0.04782  | 0.03822  | 0.05223  | 0.09086  | 0.05903  | 0.18878  | 0.05655  | 0.09312  | 0.13551  | 0.05168  | 0.10235  | 0.09324  | 0.08208  | 0.06678  | 0.04260  | 0.04019  | 0.07574  | 0.06546  | 0.03112  | 0.08762  | 0.04726  |
| PC(33:4)                | 0.00825  | 0.01222  | 0.00000  | 0.00071  | 0.00329  | 0.00751  | 0.00267  | 0.01681  | 0.00508  | 0.00675  | 0.01169  | 0.00104  | 0.01268  | 0.00834  | 0.00459  | 0.00536  | 0.00000  | 0.00285  | 0.00578  | 0.00181  | 0.00000  | 0.00267  | 0.00033  |
| PC(34:1)                | 27.64928 | 33.87672 | 26.71506 | 21.39403 | 25.37380 | 26.27694 | 22.50734 | 42.72035 | 19.79211 | 22.12419 | 43.83604 | 35.53845 | 29.57315 | 31.63975 | 21.05824 | 13.56989 | 14.28272 | 16.93112 | 15.54054 | 18.62505 | 15.09955 | 19.49018 | 20.46778 |
| PC(34:2)                | 7.32960  | 8.49938  | 4.69302  | 3.05946  | 4.39062  | 5.96851  | 5.08561  | 9.73012  | 4.04950  | 4.56700  | 8.79397  | 4.14218  | 6.33366  | 7.68428  | 3.67734  | 3.76589  | 3.21575  | 3.34945  | 4.00395  | 4.36319  | 3.76664  | 4.63321  | 4.53523  |
| PC(34:3)                | 1.06954  | 1.31434  | 0.43455  | 0.38373  | 0.53137  | 0.88819  | 0.63961  | 1.33684  | 0.54401  | 0.56696  | 1.17877  | 0.40839  | 0.85314  | 1.00934  | 0.53125  | 0.54415  | 0.42808  | 0.39419  | 0.61143  | 0.56636  | 0.40419  | 0.65191  | 0.56041  |
| PC(34:4)                | 0.50966  | 0.49614  | 0.15381  | 0.15929  | 0.21792  | 0.46876  | 0.36334  | 0.71589  | 0.29202  | 0.27724  | 0.58632  | 0.11969  | 0.45326  | 0.47442  | 0.27519  | 0.42000  | 0.28828  | 0.18276  | 0.44013  | 0.34004  | 0.19012  | 0.43403  | 0.27897  |
| PC(34:5)                | 0.41014  | 0.38793  | 0.09885  | 0.11960  | 0.15844  | 0.35833  | 0.23924  | 0.52768  | 0.22456  | 0.16717  | 0.42303  | 0.08029  | 0.31038  | 0.38315  | 0.17589  | 0.40124  | 0.25631  | 0.14074  | 0.45059  | 0.24984  | 0.15350  | 0.36248  | 0.24987  |
| PC(35:0)                | 0.28316  | 0.35264  | 0.33938  | 0.24633  | 0.30108  | 0.24898  | 0.22125  | 0.40680  | 0.19741  | 0.42872  | 0.44568  | 0.63920  | 0.23244  | 0.28081  | 0.27434  | 0.15611  | 0.18486  | 0.25647  | 0.19109  | 0.19826  | 0.15302  | 0.30250  | 0.26095  |
| PC(35:1)                | 1.99162  | 2.21611  | 1.95045  | 1.41944  | 1.65233  | 1.64863  | 1.52359  | 2.65682  | 1.25072  | 1.79343  | 2.76965  | 2.49049  | 1.69193  | 1.91695  | 1.39742  | 1.13537  | 1.22063  | 1.29844  | 1.17948  | 1.39386  | 1.00020  | 1.49333  | 1.44576  |
| PC(35:2)                | 4.13543  | 4.66869  | 3.07263  | 1.91376  | 2.94637  | 2.38872  | 2.38708  | 4.97987  | 2.51719  | 3.04257  | 5.52347  | 1.90966  | 3.65897  | 3.40079  | 2.30262  | 2.66361  | 2.44416  | 2.04465  | 2.40691  | 2.67935  | 1.89670  | 2.96186  | 2.83526  |
| PC(35:3)                | 0.53235  | 0.57420  | 0.24901  | 0.19640  | 0.32747  | 0.38592  | 0.32512  | 0.66149  | 0.26293  | 0.37214  | 0.62929  | 0.20612  | 0.46424  | 0.36088  | 0.33193  | 0.37913  | 0.32381  | 0.27757  | 0.34890  | 0.38716  | 0.20980  | 0.42355  | 0.33832  |
| PC(35:4)                | 0.31383  | 0.40105  | 0.13321  | 0.11791  | 0.14514  | 0.26065  | 0.22095  | 0.39838  | 0.15663  | 0.16992  | 0.38095  | 0.09079  | 0.22729  | 0.23547  | 0.16277  | 0.23691  | 0.18412  | 0.15426  | 0.22685  | 0.23465  | 0.11993  | 0.26552  | 0.16252  |
| PC(35:5)                | 0.39351  |          |          |          |          |          |          |          |          |          |          |          |          |          |          |          |          |          |          |          |          |          |          |

|                       |          |          |          |          |          |          |          |          |          |          |          |          |          |          |          |          |          |          |          |          |          |          |          |
|-----------------------|----------|----------|----------|----------|----------|----------|----------|----------|----------|----------|----------|----------|----------|----------|----------|----------|----------|----------|----------|----------|----------|----------|----------|
| PC(38:2)              | 0.72922  | 0.75335  | 0.99619  | 0.81700  | 0.89660  | 0.71724  | 0.53418  | 0.94268  | 0.59882  | 0.64931  | 0.93282  | 1.19687  | 0.72444  | 0.90736  | 0.63276  | 0.45625  | 0.55539  | 0.51729  | 0.37434  | 0.55984  | 0.45862  | 0.56728  | 0.72574  |
| PC(38:3)              | 0.93405  | 1.24604  | 0.78263  | 0.75689  | 0.81895  | 1.20063  | 0.96946  | 1.53557  | 0.66217  | 0.79619  | 1.22822  | 1.08514  | 1.20322  | 1.14362  | 0.77842  | 0.69565  | 0.56253  | 0.71444  | 0.56697  | 0.98538  | 0.50634  | 1.01488  | 0.65310  |
| PC(38:4)              | 7.44528  | 9.95756  | 4.91869  | 4.45659  | 5.10523  | 7.43466  | 5.80502  | 10.03473 | 4.27676  | 5.53102  | 9.10044  | 5.68210  | 7.59724  | 7.27487  | 5.64811  | 5.72724  | 4.31170  | 5.52574  | 4.50344  | 7.98963  | 3.74728  | 7.65609  | 4.84740  |
| PC(38:5)              | 20.11475 | 27.34289 | 10.31602 | 10.05548 | 11.34246 | 19.60581 | 12.95491 | 27.19234 | 11.08878 | 13.74445 | 23.35302 | 13.08255 | 18.68994 | 20.01174 | 13.24541 | 14.86142 | 12.16468 | 13.65699 | 13.64380 | 17.11635 | 9.81154  | 17.05416 | 12.95748 |
| PC(38:6)              | 20.55859 | 28.45886 | 7.52347  | 8.65345  | 13.07244 | 25.71167 | 17.93712 | 29.46210 | 12.55679 | 12.42117 | 32.12270 | 11.01164 | 19.21202 | 20.76718 | 11.55483 | 17.72586 | 18.39767 | 16.62866 | 19.64422 | 18.38240 | 12.76587 | 20.16161 | 17.54124 |
| PC(38:7)              | 2.02754  | 2.09550  | 0.44521  | 0.55801  | 1.06047  | 2.12334  | 1.44611  | 2.42175  | 0.96844  | 1.08468  | 2.72852  | 0.48793  | 1.70242  | 1.76207  | 0.90257  | 2.23438  | 1.99539  | 1.28720  | 2.44041  | 1.60266  | 1.02943  | 2.25740  | 1.85167  |
| PC(38:8)              | 0.16775  | 0.14011  | 0.02818  | 0.03468  | 0.08607  | 0.12861  | 0.09103  | 0.16895  | 0.06684  | 0.06475  | 0.19437  | 0.03999  | 0.14063  | 0.12000  | 0.06905  | 0.24439  | 0.18925  | 0.08372  | 0.19607  | 0.14150  | 0.06270  | 0.19025  | 0.14603  |
| PC(39:1)              | 0.00287  | 0.00357  | 0.02312  | 0.01504  | 0.01138  | 0.00150  | 0.00073  | 0.00072  | 0.00189  | 0.00418  | 0.00624  | 0.05433  | 0.00749  | 0.00169  | 0.00352  | 0.00080  | 0.00206  | 0.00198  | 0.00054  | 0.00107  | 0.00083  | 0.00407  | 0.00369  |
| PC(39:2)              | 0.01834  | 0.01019  | 0.04475  | 0.03932  | 0.03780  | 0.02165  | 0.01042  | 0.02401  | 0.01738  | 0.02374  | 0.02456  | 0.04818  | 0.02141  | 0.02577  | 0.02291  | 0.00470  | 0.01296  | 0.01091  | 0.00532  | 0.00809  | 0.00701  | 0.01555  | 0.01729  |
| PC(39:5)              | 0.85715  | 1.10670  | 0.43601  | 0.43512  | 0.60439  | 0.66880  | 0.51837  | 0.96301  | 0.38582  | 0.85546  | 1.24106  | 0.98963  | 0.72598  | 0.75889  | 0.55159  | 0.56734  | 0.62376  | 0.65173  | 0.71636  | 0.54660  | 0.35541  | 0.88657  | 0.65602  |
| PC(39:6)              | 1.66404  | 1.95971  | 0.58636  | 0.68797  | 1.14074  | 1.63829  | 1.22860  | 2.22931  | 0.84519  | 1.11424  | 2.29949  | 0.88982  | 1.36629  | 1.51021  | 0.88446  | 1.34266  | 1.51278  | 1.27785  | 1.65050  | 1.25626  | 0.87768  | 1.56976  | 1.26172  |
| PC(40:1)              | 0.07547  | 0.04479  | 0.18068  | 0.18456  | 0.16153  | 0.07461  | 0.02866  | 0.05344  | 0.07823  | 0.06432  | 0.10096  | 0.41762  | 0.07327  | 0.11523  | 0.06940  | 0.04176  | 0.07095  | 0.10081  | 0.04026  | 0.05881  | 0.04248  | 0.09827  | 0.12920  |
| PC(40:10)             | 0.18454  | 0.30838  | 0.03424  | 0.02787  | 0.05291  | 0.13289  | 0.09223  | 0.15714  | 0.08311  | 0.06517  | 0.18479  | 0.03780  | 0.15413  | 0.12143  | 0.05729  | 0.52871  | 0.29703  | 0.06200  | 0.27745  | 0.17288  | 0.04762  | 0.28527  | 0.19072  |
| PC(40:2)              | 0.14300  | 0.11788  | 0.28426  | 0.26938  | 0.26563  | 0.13548  | 0.10456  | 0.14954  | 0.15636  | 0.12021  | 0.17294  | 0.33765  | 0.16713  | 0.21255  | 0.12286  | 0.09239  | 0.12488  | 0.10252  | 0.07329  | 0.09486  | 0.08436  | 0.12261  | 0.20229  |
| PC(40:3)              | 0.04135  | 0.04303  | 0.07798  | 0.09776  | 0.07007  | 0.06212  | 0.04818  | 0.08165  | 0.05607  | 0.07104  | 0.06507  | 0.12815  | 0.07233  | 0.08029  | 0.07109  | 0.01549  | 0.02427  | 0.04599  | 0.02576  | 0.02353  | 0.01851  | 0.03726  | 0.03646  |
| PC(40:4)              | 0.253708 | 0.251839 | 0.050073 | 0.06562  | 0.208928 | 0.11844  | 0.094441 | 0.099184 | 0.14088  | 0.384905 | 0.337592 | 0.379608 | 0.202252 | 0.378473 | 0.089324 | 0.154525 | 0.151493 | 0.82457  | 0.131119 | 0.186773 | 0.082395 | 0.233962 | 0.350414 |
| PC(40:5)              | 3.11790  | 3.86109  | 2.07759  | 2.09075  | 2.86669  | 3.67421  | 2.86388  | 4.91775  | 2.00414  | 2.79499  | 4.52577  | 3.24821  | 3.65600  | 3.72684  | 2.46638  | 2.53209  | 2.53036  | 2.80684  | 2.56951  | 3.82326  | 1.80916  | 3.31302  | 2.22603  |
| PC(40:6)              | 11.18483 | 16.67849 | 5.97243  | 6.09228  | 9.63496  | 13.66231 | 9.43913  | 18.61447 | 6.38283  | 8.05577  | 15.43631 | 9.91977  | 13.05072 | 13.14413 | 7.22917  | 9.26248  | 9.68991  | 12.74210 | 9.39849  | 11.95112 | 7.04802  | 12.74436 | 9.45248  |
| PC(40:7)              | 4.22974  | 4.22656  | 1.06731  | 1.23379  | 2.64327  | 4.25735  | 2.63351  | 5.09288  | 1.72320  | 2.33143  | 5.28560  | 1.37841  | 3.70213  | 3.82093  | 1.70384  | 3.79134  | 4.63928  | 2.93053  | 3.92779  | 3.26927  | 2.26899  | 3.97697  | 4.07138  |
| PC(40:8)              | 0.44866  | 0.42070  | 0.10354  | 0.10757  | 0.19082  | 0.39234  | 0.23747  | 0.42804  | 0.14378  | 0.22318  | 0.52060  | 0.16912  | 0.34684  | 0.29393  | 0.16778  | 0.63341  | 0.48967  | 0.23767  | 0.47654  | 0.36972  | 0.16274  | 0.54753  | 0.36668  |
| PC(40:9)              | 0.35501  | 0.36386  | 0.07453  | 0.08452  | 0.14211  | 0.32826  | 0.22665  | 0.41956  | 0.16816  | 0.13116  | 0.41468  | 0.06416  | 0.31942  | 0.31716  | 0.10404  | 0.79369  | 0.52817  | 0.17787  | 0.43055  | 0.40443  | 0.16346  | 0.58016  | 0.38365  |
| PC(41:5)              | 0.08614  | 0.06740  | 0.02245  | 0.04117  | 0.04454  | 0.04770  | 0.01929  | 0.08298  | 0.01383  | 0.08734  | 0.08385  | 0.13658  | 0.04408  | 0.03964  | 0.04639  | 0.06520  | 0.07717  | 0.09173  | 0.07892  | 0.03912  | 0.01074  | 0.09404  | 0.08258  |
| PC(42:10)             | 0.60230  | 0.57535  | 0.21282  | 0.13001  | 0.28167  | 0.56922  | 0.45722  | 0.74275  | 0.34272  | 0.23791  | 0.78796  | 0.19595  | 0.46377  | 0.39908  | 0.16444  | 0.98444  | 0.84777  | 0.28232  | 0.74678  | 0.48830  | 0.23080  | 0.85067  | 0.53384  |
| PC(42:11)             | 0.49113  | 0.43288  | 0.03488  | 0.06753  | 0.17702  | 0.45472  | 0.28905  | 0.53808  | 0.18560  | 0.17826  | 0.64783  | 0.03946  | 0.45478  | 0.30596  | 0.10191  | 1.25937  | 1.07732  | 0.25354  | 0.91433  | 0.48464  | 0.15039  | 0.90910  | 0.64461  |
| PC(42:2)              | 0.00473  | 0.00381  | 0.04080  | 0.03309  | 0.02864  | 0.00835  | 0.00256  | 0.00347  | 0.01141  | 0.00939  | 0.00909  | 0.06763  | 0.00980  | 0.00648  | 0.01272  | 0.00274  | 0.01246  | 0.00300  | 0.00730  | 0.00344  | 0.00256  | 0.01227  | 0.01773  |
| PC(42:5)              | 0.21457  | 0.20587  | 0.13150  | 0.15856  | 0.18896  | 0.12924  | 0.08117  | 0.24162  | 0.09746  | 0.20192  | 0.23497  | 0.22066  | 0.19909  | 0.23746  | 0.11235  | 0.15806  | 0.14892  | 0.19395  | 0.15456  | 0.17167  | 0.08469  | 0.24738  | 0.22516  |
| PC(42:6)              | 0.62836  | 0.56294  | 0.23042  | 0.62836  | 0.47861  | 0.42431  | 0.20734  | 0.72265  | 0.27229  | 0.53775  | 0.66800  | 0.48680  | 0.53130  | 0.64753  | 0.22882  | 0.41343  | 0.47100  | 0.54407  | 0.44520  | 0.42375  | 0.22528  | 0.54622  | 0.62298  |
| PC(42:7)              | 0.38065  | 0.42187  | 0.12705  | 0.20175  | 0.32465  | 0.39463  | 0.20721  | 0.50400  | 0.17142  | 0.24916  | 0.50414  | 0.20421  | 0.43355  | 0.48043  | 0.15134  | 0.34379  | 0.44068  | 0.39506  | 0.32348  | 0.35285  | 0.21463  | 0.44177  | 0.45540  |
| PC(42:8)              | 0.11198  | 0.12342  | 0.03981  | 0.04231  | 0.05723  | 0.08483  | 0.07961  | 0.11909  | 0.05353  | 0.05523  | 0.13390  | 0.05447  | 0.07972  | 0.05798  | 0.03530  | 0.10470  | 0.10877  | 0.08792  | 0.10507  | 0.07905  | 0.04305  | 0.11809  | 0.08592  |
| PC(44:10)             | 0.09216  | 0.09529  | 0.07928  | 0.06365  | 0.11388  | 0.12378  | 0.14982  | 0.19899  | 0.13322  | 0.09067  | 0.13404  | 0.09430  | 0.12343  | 0.13456  | 0.07723  | 0.08924  | 0.09167  | 0.05431  | 0.08678  | 0.06672  | 0.05057  | 0.10002  | 0.06980  |
| PC(44:6)              | 0.03272  | 0.04017  | 0.03808  | 0.04401  | 0.05227  | 0.03706  | 0.01739  | 0.06792  | 0.01774  | 0.03181  | 0.05603  | 0.05546  | 0.06391  | 0.03969  | 0.04674  | 0.04425  | 0.08019  | 0.05520  | 0.03982  | 0.04094  | 0.01809  | 0.06027  | 0.06381  |
| PC(44:9)              | 0.04450  | 0.05931  | 0.03625  | 0.04226  | 0.03989  | 0.02342  | 0.01691  | 0.04314  | 0.01892  | 0.01401  | 0.03938  | 0.06162  | 0.03641  | 0.03104  | 0.02068  | 0.05162  | 0.05875  | 0.05589  | 0.02804  | 0.06322  | 0.03052  | 0.05466  | 0.05497  |
| PC(46:7)              | 0.01234  | 0.01067  | 0.00922  | 0.01277  | 0.01957  | 0.01096  | 0.00327  | 0.01759  | 0.00278  | 0.01097  | 0.01437  | 0.01759  | 0.01639  | 0.01047  | 0.00000  | 0.01438  | 0.02277  | 0.01853  | 0.01355  | 0.01141  | 0.00418  | 0.02144  | 0.01701  |
| PC(O-28:0)            | 0.00265  | 0.00440  | 0.00584  | 0.00236  | 0.00864  | 0.00657  | 0.00521  | 0.02319  | 0.00653  | 0.01639  | 0.00967  | 0.01627  | 0.00867  | 0.01005  | 0.01319  | 0.00620  | 0.00312  | 0.01413  | 0.00818  | 0.00773  | 0.00271  | 0.00798  | 0.00867  |
| PC(O-30:0)            | 0.05333  | 0.06530  | 0.08037  | 0.06018  | 0.08277  | 0.07190  | 0.05715  | 0.13611  | 0.06045  | 0.20881  | 0.12314  | 0.23377  | 0.06726  | 0.09533  | 0.13172  | 0.04189  | 0.03983  | 0.13986  | 0.05589  | 0.06097  | 0.04221  | 0.07536  | 0.07469  |
| PC(O-32:0)            | 0.09554  | 0.13602  | 0.14969  | 0.12978  | 0.09174  | 0.10674  | 0.07117  | 0.13830  | 0.06117  | 0.27962  | 0.24966  | 0.54165  | 0.06840  | 0.12239  | 0.22133  | 0.05661  | 0.06372  | 0.19004  | 0.06661  | 0.09836  | 0.07747  | 0.12447  | 0.12453  |
| PC(O-34:0)            | 0.04706  | 0.06326  | 0.07873  | 0.05126  | 0.03701  | 0.05205  | 0.02174  | 0.05890  | 0.02101  | 0.10620  | 0.11175  | 0.28857  | 0.02270  | 0.04323  | 0.06836  | 0.00953  | 0.01150  | 0.04719  | 0.01055  | 0.02065  | 0.01563  | 0.02996  | 0.02453  |
| PC(P-28:0)/PC(O-28:1) | 0.00539  | 0.00301  | 0.00644  | 0.00058  | 0.01642  | 0.00862  | 0.00657  | 0.01910  | 0.01428  | 0.05940  | 0.01826  | 0.02023  | 0.01519  | 0.02468  | 0.02130  | 0.01300  | 0.01229  | 0.04136  | 0.01794  | 0.01754  | 0.00782  | 0.01858  | 0.02467  |
| PC(P-30:0)/PC(O-30:1) | 0.19599  | 0.21409  | 0.21161  | 0.12333  | 0.22036  | 0.16221  | 0.13259  | 0.24131  | 0.16888  | 0.72222  | 0.52273  | 0.61299  | 0.18310  | 0.27118  | 0.32425  | 0.13664  | 0.13374  | 0.49816  | 0.16175  | 0.18721  | 0.09743  | 0.20697  | 0.23685  |
| PC(P-30:1)/PC(O-30:2) | 0.01738  | 0.00956  | 0.01183  | 0.00143  | 0.01312  | 0.00642  | 0.00930  | 0.02009  | 0.01180  | 0.09703  | 0.05070  | 0.03496  | 0.01451  | 0.02179  | 0.02764  | 0.01542  | 0.01418  | 0.05212  | 0.01780  | 0.02238  | 0.00695  | 0.02115  | 0.02836  |
| PC(P-32:0)/PC(O-32:1) | 0.52012  | 0.64554  | 0.57586  | 0.43013  | 0.42676  | 0.35234  | 0.27878  | 0.67809  | 0.26294  | 0.99001  | 1.02245  | 1.81039  | 0.41978  | 0.50993  | 0.62134  | 0.20389  | 0.20701  | 0.66773  | 0.25401  | 0.32967  | 0.21826  | 0.36098  | 0.35845  |
| PC(P-32:1)/PC(O-32:2) | 0.27653  | 0.30097  | 0.22437  | 0.14755  | 0.22418  | 0.19045  | 0.15975  | 0.38940  | 0.16968  | 0.63123  | 0.55456  | 0.65357  | 0.22878  | 0.26735  | 0.28452  | 0.09280  | 0.09598  | 0.32782  | 0.12585  | 0.143    |          |          |          |

|                       |         |         |         |         |         |         |         |         |         |         |         |         |         |         |         |         |         |         |         |         |         |         |         |
|-----------------------|---------|---------|---------|---------|---------|---------|---------|---------|---------|---------|---------|---------|---------|---------|---------|---------|---------|---------|---------|---------|---------|---------|---------|
| PC(P-38:6)/PC(O-38:7) | 0.76194 | 0.76733 | 0.25298 | 0.31045 | 0.54316 | 0.51667 | 0.33921 | 0.61224 | 0.33154 | 1.33616 | 1.04661 | 1.36117 | 0.69897 | 0.75716 | 0.48332 | 0.44585 | 0.45972 | 1.70758 | 0.59909 | 0.57148 | 0.25026 | 0.72400 | 0.64581 |
| PC(P-40:4)/PC(O-40:5) | 0.04436 | 0.06559 | 0.02811 | 0.03687 | 0.03144 | 0.01722 | 0.00688 | 0.02718 | 0.00525 | 0.08725 | 0.04796 | 0.24436 | 0.04226 | 0.05163 | 0.05194 | 0.01646 | 0.01163 | 0.14554 | 0.02418 | 0.03294 | 0.02197 | 0.06797 | 0.03467 |
| PC(P-40:5)/PC(O-40:6) | 0.16779 | 0.21645 | 0.10647 | 0.12494 | 0.16697 | 0.10860 | 0.09048 | 0.16305 | 0.07406 | 0.35466 | 0.21889 | 0.64475 | 0.18882 | 0.21720 | 0.17276 | 0.08486 | 0.07977 | 0.54823 | 0.10400 | 0.16853 | 0.08307 | 0.18100 | 0.15621 |
| PC(P-42:7)/PC(O-42:8) | 0.06391 | 0.08896 | 0.05248 | 0.10395 | 0.12191 | 0.07914 | 0.07486 | 0.13736 | 0.07298 | 0.06340 | 0.06437 | 0.07874 | 0.04580 | 0.04840 | 0.04992 | 0.03561 | 0.04042 | 0.07529 | 0.04244 | 0.05226 | 0.03914 | 0.05652 | 0.04846 |
| PE(32:1)              | 0.00368 | 0.01467 | 0.00876 | 0.00281 | 0.00039 | 0.00207 | 0.00141 | 0.00849 | 0.00025 | 0.00397 | 0.00126 | 0.00119 | 0.00201 | 0.00395 | 0.00820 | 0.00178 | 0.00126 | 0.00766 | 0.00241 | 0.00310 | 0.00228 | 0.00716 | 0.00320 |
| PE(32:2)              | 0.00000 | 0.00449 | 0.00092 | 0.00000 | 0.00000 | 0.00000 | 0.00000 | 0.00009 | 0.00000 | 0.00090 | 0.00000 | 0.00000 | 0.00000 | 0.00020 | 0.00154 | 0.00000 | 0.00000 | 0.00138 | 0.00012 | 0.00011 | 0.00000 | 0.00029 | 0.00000 |
| PE(34:1)              | 0.02910 | 0.03631 | 0.04120 | 0.03463 | 0.00932 | 0.02819 | 0.01790 | 0.05316 | 0.00557 | 0.04436 | 0.02621 | 0.03873 | 0.02146 | 0.02856 | 0.05730 | 0.01999 | 0.02970 | 0.04663 | 0.03656 | 0.03471 | 0.03299 | 0.10830 | 0.05909 |
| PE(34:2)              | 0.03425 | 0.05214 | 0.03996 | 0.03876 | 0.04097 | 0.03227 | 0.02310 | 0.05367 | 0.02198 | 0.03003 | 0.03351 | 0.03178 | 0.03610 | 0.04561 | 0.03201 | 0.02027 | 0.02216 | 0.03028 | 0.02009 | 0.03298 | 0.02351 | 0.03120 | 0.02676 |
| PE(34:3)              | 0.00000 | 0.00117 | 0.00000 | 0.00000 | 0.00015 | 0.00039 | 0.00000 | 0.00116 | 0.00000 | 0.00064 | 0.00019 | 0.00000 | 0.00031 | 0.00040 | 0.00020 | 0.00000 | 0.00020 | 0.00020 | 0.00017 | 0.00038 | 0.00000 | 0.00162 | 0.00043 |
| PE(35:1)              | 0.00126 | 0.00148 | 0.00272 | 0.00220 | 0.00071 | 0.00213 | 0.00059 | 0.00361 | 0.00019 | 0.00419 | 0.00078 | 0.00372 | 0.00077 | 0.00219 | 0.00558 | 0.00048 | 0.00227 | 0.00364 | 0.00257 | 0.00165 | 0.00156 | 0.00982 | 0.00429 |
| PE(35:2)              | 0.00313 | 0.00560 | 0.00172 | 0.00311 | 0.00082 | 0.00586 | 0.00081 | 0.00565 | 0.00012 | 0.00727 | 0.00254 | 0.00029 | 0.00184 | 0.00228 | 0.00514 | 0.00335 | 0.00505 | 0.00320 | 0.00404 | 0.00201 | 0.00121 | 0.00703 | 0.00500 |
| PE(36:2)              | 0.03416 | 0.03446 | 0.04391 | 0.02482 | 0.01202 | 0.02938 | 0.01200 | 0.03919 | 0.00272 | 0.03912 | 0.01741 | 0.02876 | 0.01625 | 0.03033 | 0.04250 | 0.01706 | 0.02693 | 0.02943 | 0.02473 | 0.02184 | 0.01948 | 0.06273 | 0.04226 |
| PE(36:5)              | 0.25327 | 0.31188 | 0.19446 | 0.27415 | 0.37156 | 0.24965 | 0.23517 | 0.24459 | 0.24791 | 0.20170 | 0.18161 | 0.11611 | 0.23556 | 0.24811 | 0.29332 | 0.15494 | 0.13182 | 0.16594 | 0.14325 | 0.21191 | 0.18004 | 0.20927 | 0.15944 |
| PE(36:6)              | 0.00494 | 0.00444 | 0.00100 | 0.00137 | 0.00079 | 0.00548 | 0.00102 | 0.00944 | 0.00000 | 0.00555 | 0.00412 | 0.00000 | 0.00339 | 0.00498 | 0.00492 | 0.00454 | 0.00320 | 0.00363 | 0.00795 | 0.00634 | 0.00256 | 0.01242 | 0.00727 |
| PE(37:4)              | 0.00515 | 0.00576 | 0.00359 | 0.00331 | 0.00018 | 0.00880 | 0.00313 | 0.01165 | 0.00000 | 0.00795 | 0.00387 | 0.00158 | 0.00292 | 0.00305 | 0.01106 | 0.00364 | 0.00325 | 0.00925 | 0.00640 | 0.00555 | 0.00279 | 0.01725 | 0.00594 |
| PE(37:5)              | 0.00458 | 0.00832 | 0.00149 | 0.00238 | 0.00000 | 0.01309 | 0.00192 | 0.01145 | 0.00038 | 0.00195 | 0.00316 | 0.00000 | 0.00373 | 0.00178 | 0.00625 | 0.00308 | 0.00320 | 0.00195 | 0.00552 | 0.00327 | 0.00332 | 0.01441 | 0.00290 |
| PE(38:3)              | 0.01787 | 0.02161 | 0.01826 | 0.01630 | 0.00641 | 0.02281 | 0.01062 | 0.03262 | 0.00094 | 0.03738 | 0.01802 | 0.01953 | 0.01535 | 0.01400 | 0.00201 | 0.01133 | 0.01289 | 0.02969 | 0.01792 | 0.02037 | 0.01107 | 0.05448 | 0.02090 |
| PE(38:4)              | 0.18771 | 0.23501 | 0.17667 | 0.18986 | 0.07740 | 0.22194 | 0.11933 | 0.36984 | 0.03948 | 0.29822 | 0.20692 | 0.16599 | 0.17031 | 0.16525 | 0.40726 | 0.15879 | 0.16402 | 0.34171 | 0.19514 | 0.27947 | 0.14513 | 0.63911 | 0.27844 |
| PE(38:5)              | 0.35196 | 0.42484 | 0.23575 | 0.26813 | 0.16451 | 0.33065 | 0.16134 | 0.53186 | 0.09283 | 0.48182 | 0.30997 | 0.23894 | 0.28059 | 0.30937 | 0.62094 | 0.25162 | 0.24813 | 0.46210 | 0.31645 | 0.39483 | 0.22869 | 0.73831 | 0.42618 |
| PE(38:6)              | 0.44289 | 0.54181 | 0.38298 | 0.34310 | 0.39100 | 0.46253 | 0.32695 | 0.57101 | 0.25412 | 0.43405 | 0.43688 | 0.33435 | 0.39789 | 0.44780 | 0.56305 | 0.33155 | 0.38847 | 0.63725 | 0.43213 | 0.51601 | 0.37161 | 0.86799 | 0.51384 |
| PE(38:7)              | 0.01005 | 0.01353 | 0.00331 | 0.00340 | 0.00489 | 0.01213 | 0.00425 | 0.02451 | 0.00106 | 0.01123 | 0.01182 | 0.00380 | 0.00913 | 0.01260 | 0.01182 | 0.01140 | 0.01234 | 0.01667 | 0.01797 | 0.01531 | 0.00713 | 0.03643 | 0.01728 |
| PE(38:8)              | 0.00000 | 0.00000 | 0.00000 | 0.00000 | 0.00000 | 0.00000 | 0.00000 | 0.00007 | 0.00000 | 0.00000 | 0.00021 | 0.00000 | 0.00000 | 0.00022 | 0.00000 | 0.00000 | 0.00018 | 0.00000 | 0.00102 | 0.00035 | 0.00000 | 0.00298 | 0.00091 |
| PE(39:5)              | 0.00665 | 0.00591 | 0.00407 | 0.00280 | 0.00114 | 0.00609 | 0.00146 | 0.01132 | 0.00044 | 0.00662 | 0.00469 | 0.00492 | 0.00355 | 0.00377 | 0.00652 | 0.00425 | 0.00534 | 0.00743 | 0.00701 | 0.00494 | 0.00256 | 0.02021 | 0.00905 |
| PE(39:6)              | 0.00853 | 0.01470 | 0.00323 | 0.00033 | 0.00032 | 0.01479 | 0.00712 | 0.02807 | 0.00146 | 0.00222 | 0.00665 | 0.00013 | 0.00113 | 0.00451 | 0.00119 | 0.00844 | 0.01491 | 0.00959 | 0.01832 | 0.01530 | 0.01084 | 0.05413 | 0.01645 |
| PE(39:7)              | 0.00168 | 0.00053 | 0.00022 | 0.00046 | 0.00061 | 0.00030 | 0.00000 | 0.00199 | 0.00000 | 0.00060 | 0.00293 | 0.00223 | 0.00154 | 0.00233 | 0.00178 | 0.00000 | 0.00393 | 0.00433 | 0.00081 | 0.00201 | 0.00031 | 0.00134 | 0.00363 |
| PE(40:4)              | 0.00113 | 0.00179 | 0.00455 | 0.00304 | 0.00086 | 0.00142 | 0.00049 | 0.00527 | 0.00000 | 0.01080 | 0.00198 | 0.00953 | 0.00203 | 0.00315 | 0.01205 | 0.00139 | 0.00192 | 0.00658 | 0.00176 | 0.00232 | 0.00046 | 0.01570 | 0.00508 |
| PE(40:5)              | 0.02701 | 0.03938 | 0.02609 | 0.02545 | 0.02026 | 0.03388 | 0.01705 | 0.05878 | 0.00676 | 0.05756 | 0.03264 | 0.03549 | 0.02757 | 0.03608 | 0.07145 | 0.02611 | 0.03507 | 0.06395 | 0.04498 | 0.04431 | 0.02609 | 0.12794 | 0.05434 |
| PE(40:6)              | 0.07217 | 0.09619 | 0.05903 | 0.06952 | 0.05091 | 0.08574 | 0.04910 | 0.20122 | 0.01618 | 0.11294 | 0.08427 | 0.09342 | 0.08133 | 0.10979 | 0.14784 | 0.06885 | 0.10732 | 0.23570 | 0.09270 | 0.14557 | 0.06840 | 0.29557 | 0.15790 |
| PE(40:7)              | 0.05229 | 0.05701 | 0.01534 | 0.02149 | 0.02376 | 0.04696 | 0.01578 | 0.09116 | 0.00399 | 0.06121 | 0.04444 | 0.01939 | 0.03712 | 0.06453 | 0.06375 | 0.03593 | 0.06642 | 0.08446 | 0.06748 | 0.06460 | 0.03521 | 0.15865 | 0.08596 |
| PE(40:8)              | 0.00400 | 0.00246 | 0.00000 | 0.00047 | 0.00135 | 0.00316 | 0.00012 | 0.00600 | 0.00000 | 0.00573 | 0.00378 | 0.00061 | 0.00237 | 0.00377 | 0.00489 | 0.00559 | 0.00545 | 0.00331 | 0.00549 | 0.00536 | 0.00140 | 0.01226 | 0.00420 |
| PE(40:9)              | 0.00422 | 0.00196 | 0.00000 | 0.00047 | 0.00000 | 0.00295 | 0.00000 | 0.00468 | 0.00000 | 0.00197 | 0.00231 | 0.00000 | 0.00251 | 0.00223 | 0.00280 | 0.00670 | 0.00404 | 0.00187 | 0.00588 | 0.00467 | 0.00074 | 0.01023 | 0.00503 |
| PE(41:6)              | 0.00301 | 0.00425 | 0.00064 | 0.00326 | 0.00209 | 0.00279 | 0.00000 | 0.00528 | 0.00000 | 0.00980 | 0.00301 | 0.00771 | 0.00261 | 0.00377 | 0.00553 | 0.00317 | 0.00401 | 0.00781 | 0.00510 | 0.00342 | 0.00094 | 0.01206 | 0.00795 |
| PE(41:7)              | 0.00047 | 0.00076 | 0.00003 | 0.00075 | 0.00034 | 0.00049 | 0.00009 | 0.00204 | 0.00000 | 0.00092 | 0.00078 | 0.00014 | 0.00110 | 0.00081 | 0.00064 | 0.00104 | 0.00157 | 0.00096 | 0.00166 | 0.00074 | 0.00106 | 0.00454 | 0.00098 |
| PE(42:11)             | 0.00048 | 0.00024 | 0.00000 | 0.00000 | 0.00024 | 0.00076 | 0.00000 | 0.00082 | 0.00000 | 0.00070 | 0.00050 | 0.00055 | 0.00014 | 0.00089 | 0.00035 | 0.00104 | 0.00171 | 0.00048 | 0.00228 | 0.00156 | 0.00000 | 0.00443 | 0.00210 |
| PE(42:6)              | 0.00689 | 0.00482 | 0.00038 | 0.00365 | 0.00477 | 0.00266 | 0.00046 | 0.00793 | 0.00000 | 0.01533 | 0.00378 | 0.00476 | 0.00198 | 0.00594 | 0.01066 | 0.00207 | 0.00315 | 0.00960 | 0.00506 | 0.00399 | 0.00033 | 0.01195 | 0.00874 |
| PE(42:7)              | 0.00087 | 0.00115 | 0.00000 | 0.00105 | 0.00052 | 0.00080 | 0.00012 | 0.00447 | 0.00000 | 0.00222 | 0.00192 | 0.00025 | 0.00043 | 0.00225 | 0.00336 | 0.00113 | 0.00324 | 0.00199 | 0.00138 | 0.00229 | 0.00103 | 0.01129 | 0.00605 |
| PE(P-32:1)/PE(O-32:2) | 0.00316 | 0.00200 | 0.00399 | 0.00371 | 0.00183 | 0.00110 | 0.00067 | 0.00711 | 0.00065 | 0.01493 | 0.00369 | 0.01089 | 0.00235 | 0.00216 | 0.00914 | 0.00220 | 0.00112 | 0.00627 | 0.00230 | 0.00205 | 0.00014 | 0.00428 | 0.00586 |
| PE(P-34:0)/PE(O-34:1) | 0.00511 | 0.00413 | 0.00919 | 0.00477 | 0.00616 | 0.00299 | 0.00216 | 0.00781 | 0.00136 | 0.01902 | 0.00670 | 0.02139 | 0.00419 | 0.00612 | 0.01455 | 0.00313 | 0.00159 | 0.01536 | 0.00530 | 0.00416 | 0.00103 | 0.01017 | 0.01211 |
| PE(P-34:1)/PE(O-34:2) | 0.02680 | 0.02318 | 0.04095 | 0.03238 | 0.02362 | 0.01837 | 0.01117 | 0.04076 | 0.00710 | 0.07049 | 0.02781 | 0.09051 | 0.01998 | 0.02300 | 0.05784 | 0.01603 | 0.01309 | 0.04444 | 0.02066 | 0.02114 | 0.01055 | 0.03449 | 0.03378 |
| PE(P-34:2)/PE(O-34:3) | 0.00867 | 0.00630 | 0.00729 | 0.00837 | 0.00731 | 0.00489 | 0.00092 | 0.01324 | 0.00047 | 0.02645 | 0.00759 | 0.02348 | 0.00577 | 0.00681 | 0.01938 | 0.00515 | 0.00513 | 0.01596 | 0.00776 | 0.00646 | 0.00143 | 0.01047 | 0.01355 |
| PE(P-36:0)/PE(O-36:1) | 0.00267 | 0.00283 | 0.00838 | 0.00418 | 0.00293 | 0.00160 | 0.00097 | 0.00312 | 0.00000 | 0.01162 | 0.00353 | 0.01631 | 0.00240 | 0.00513 | 0.00860 | 0.00159 | 0.00060 | 0.00720 | 0.00284 | 0.00170 | 0.00097 | 0.00695 | 0.00785 |
| PE(P-36:1)/PE(O-36:2) | 0.01655 | 0.01275 | 0.03160 | 0.01390 | 0.00984 | 0.00536 | 0.00384 | 0.01323 | 0.00132 | 0.03589 | 0.01226 | 0.04351 | 0.00689 | 0.01209 | 0.02699 | 0.00737 | 0.00592 | 0.02524 | 0.00899 | 0.01038 | 0.00421 | 0.01747 | 0.01    |

|                        |         |         |         |         |         |         |         |         |         |         |         |         |         |         |         |         |         |         |         |         |           |         |         |
|------------------------|---------|---------|---------|---------|---------|---------|---------|---------|---------|---------|---------|---------|---------|---------|---------|---------|---------|---------|---------|---------|-----------|---------|---------|
| PE(P-40:5)/PE(O-40:6)  | 0.24481 | 0.25792 | 0.17549 | 0.29121 | 0.26804 | 0.17859 | 0.11400 | 0.38470 | 0.07580 | 0.75693 | 0.41675 | 0.82859 | 0.32001 | 0.33380 | 0.71915 | 0.24017 | 0.16063 | 0.83603 | 0.34267 | 0.37980 | 0.13088   | 0.59433 | 0.52593 |
| PE(P-40:6)/PE(O-40:7)  | 0.41539 | 0.38026 | 0.21551 | 0.28681 | 0.31143 | 0.27382 | 0.16577 | 0.51012 | 0.07324 | 1.15688 | 0.49813 | 0.87086 | 0.35841 | 0.45041 | 0.92143 | 0.32889 | 0.25877 | 1.18170 | 0.41984 | 0.46350 | 0.17915   | 0.71669 | 0.65219 |
| PE(P-40:7)/PE(O-40:8)  | 0.20788 | 0.16089 | 0.06209 | 0.11822 | 0.13379 | 0.12874 | 0.03608 | 0.20054 | 0.01647 | 0.51036 | 0.18383 | 0.35315 | 0.14417 | 0.19018 | 0.31537 | 0.14565 | 0.14448 | 0.47472 | 0.19449 | 0.19523 | 0.06354   | 0.29407 | 0.29840 |
| PE(P-40:8)/PE(O-40:9)  | 0.00909 | 0.00411 | 0.00013 | 0.00143 | 0.00412 | 0.00356 | 0.00042 | 0.00827 | 0.00000 | 0.02179 | 0.00753 | 0.00905 | 0.00577 | 0.00673 | 0.01552 | 0.00811 | 0.00808 | 0.02695 | 0.01291 | 0.01201 | 0.00065   | 0.01848 | 0.01300 |
| PE(P-42:4)/PE(O-42:5)  | 0.00078 | 0.00032 | 0.00042 | 0.00330 | 0.00229 | 0.00000 | 0.00000 | 0.00124 | 0.00000 | 0.01163 | 0.00213 | 0.01453 | 0.00258 | 0.00083 | 0.00997 | 0.00238 | 0.00000 | 0.00613 | 0.00297 | 0.00194 | 0.00000   | 0.00845 | 0.00499 |
| PE(P-42:5)/PE(O-42:6)  | 0.00918 | 0.00830 | 0.00622 | 0.01421 | 0.01560 | 0.00667 | 0.00311 | 0.01265 | 0.00151 | 0.04468 | 0.01544 | 0.05566 | 0.01275 | 0.01181 | 0.04537 | 0.01204 | 0.00767 | 0.03781 | 0.01617 | 0.01577 | 0.00672   | 0.03558 | 0.02832 |
| PE(P-42:6)/PE(O-42:7)  | 0.02133 | 0.01774 | 0.01067 | 0.01882 | 0.02154 | 0.01096 | 0.00521 | 0.02027 | 0.00189 | 0.08751 | 0.02340 | 0.07049 | 0.01931 | 0.02323 | 0.06442 | 0.01853 | 0.01191 | 0.08267 | 0.02134 | 0.02443 | 0.00814   | 0.04660 | 0.04212 |
| PE(P-42:7)/PE(O-42:8)  | 0.01461 | 0.00863 | 0.00477 | 0.01238 | 0.01393 | 0.00960 | 0.00243 | 0.00158 | 0.00118 | 0.05024 | 0.01329 | 0.04098 | 0.01091 | 0.01424 | 0.03649 | 0.01175 | 0.00936 | 0.04893 | 0.01623 | 0.01373 | 0.00433   | 0.02844 | 0.02375 |
| PE(P-42:8)/PE(O-42:9)  | 0.00238 | 0.00202 | 0.00244 | 0.00333 | 0.00155 | 0.00261 | 0.00141 | 0.00515 | 0.00029 | 0.00984 | 0.00234 | 0.00403 | 0.00137 | 0.00202 | 0.00766 | 0.00164 | 0.00144 | 0.00959 | 0.00429 | 0.00241 | 0.00147   | 0.00887 | 0.00515 |
| PE(P-44:6)/PE(O-44:7)  | 0.00000 | 0.00000 | 0.00000 | 0.00019 | 0.00034 | 0.00000 | 0.00000 | 0.00000 | 0.00000 | 0.00167 | 0.00000 | 0.00249 | 0.00000 | 0.00064 | 0.00115 | 0.00000 | 0.00012 | 0.00178 | 0.00026 | 0.00000 | 0.00000   | 0.00112 | 0.00079 |
| PE(P-44:7)/PE(O-44:8)  | 0.00000 | 0.00033 | 0.00000 | 0.00095 | 0.00022 | 0.00000 | 0.00000 | 0.00018 | 0.00000 | 0.00245 | 0.00033 | 0.00467 | 0.00000 | 0.00015 | 0.00200 | 0.00022 | 0.00000 | 0.00036 | 0.00000 | 0.00000 | 0.00000   | 0.00318 | 0.00096 |
| PE(P-44:9)/PE(O-44:10) | 0.00153 | 0.00200 | 0.00301 | 0.00219 | 0.00192 | 0.00247 | 0.00086 | 0.00328 | 0.00067 | 0.00179 | 0.00052 | 0.00146 | 0.00149 | 0.00369 | 0.00229 | 0.00036 | 0.00041 | 0.00085 | 0.00072 | 0.00060 | 0.00086   | 0.00234 | 0.00178 |
| PG(32:0)               | 0.00000 | 0.01369 | 0.00100 | 0.00011 | 0.00000 | 0.00019 | 0.00000 | 0.00018 | 0.00000 | 0.00000 | 0.00000 | 0.00138 | 0.00000 | 0.00000 | 0.00187 | 0.00000 | 0.00023 | 0.00078 | 0.00130 | 0.00000 | 0.00000   | 0.00291 | 0.00270 |
| PG(32:1)               | 0.00000 | 0.04299 | 0.00078 | 0.00000 | 0.00000 | 0.00035 | 0.00048 | 0.00121 | 0.00000 | 0.00018 | 0.00031 | 0.00015 | 0.00012 | 0.00052 | 0.00197 | 0.00000 | 0.00000 | 0.00499 | 0.00000 | 0.00044 | 0.00000   | 0.00105 | 0.00036 |
| PG(32:5)               | 0.00011 | 0.00000 | 0.00032 | 0.00006 | 0.00000 | 0.00013 | 0.00012 | 0.00009 | 0.00020 | 0.00017 | 0.00000 | 0.00000 | 0.00000 | 0.00000 | 0.00007 | 0.00000 | 0.00639 | 0.00666 | 0.00014 | 0.00017 | 0.00000   | 0.00016 | 0.00004 |
| PG(34:1)               | 0.00064 | 0.04017 | 0.00149 | 0.00089 | 0.00034 | 0.00091 | 0.00189 | 0.00396 | 0.00107 | 0.00608 | 0.00153 | 0.00049 | 0.00124 | 0.00684 | 0.00143 | 0.00081 | 0.00266 | 0.00202 | 0.00158 | 0.00248 | 0.00044   | 0.00588 | 0.00271 |
| PG(34:2)               | 0.00000 | 0.04525 | 0.00062 | 0.00042 | 0.00005 | 0.00016 | 0.00036 | 0.00244 | 0.00000 | 0.00028 | 0.00005 | 0.00050 | 0.00029 | 0.00123 | 0.00135 | 0.00116 | 0.00059 | 0.00707 | 0.00445 | 0.00169 | 0.00051   | 0.00473 | 0.00444 |
| PG(34:3)               | 0.00037 | 0.00454 | 0.00042 | 0.00009 | 0.00000 | 0.00034 | 0.00031 | 0.00000 | 0.00020 | 0.00022 | 0.00008 | 0.00033 | 0.00017 | 0.00000 | 0.00027 | 0.00003 | 0.00007 | 0.00015 | 0.00004 | 0.00040 | 0.00025   | 0.00068 | 0.00132 |
| PG(34:4)               | 0.00046 | 0.00196 | 0.00080 | 0.00024 | 0.00010 | 0.00000 | 0.00000 | 0.00000 | 0.00001 | 0.00025 | 0.00021 | 0.00064 | 0.00021 | 0.00029 | 0.00048 | 0.00058 | 0.00026 | 0.00072 | 0.00013 | 0.00066 | 0.00035   | 0.00066 | 0.00020 |
| PG(34:5)               | 0.00000 | 0.00745 | 0.00000 | 0.00000 | 0.00000 | 0.00000 | 0.00000 | 0.00000 | 0.00000 | 0.00019 | 0.00000 | 0.00000 | 0.00000 | 0.00021 | 0.00000 | 0.00000 | 0.00055 | 0.00077 | 0.00260 | 0.00000 | 0.00000   | 0.00292 | 0.00002 |
| PG(36:1)               | 0.00000 | 0.01199 | 0.00315 | 0.00094 | 0.00064 | 0.00088 | 0.00112 | 0.00232 | 0.00083 | 0.00116 | 0.00129 | 0.00159 | 0.00143 | 0.00049 | 0.00212 | 0.00041 | 0.00000 | 0.00239 | 0.00041 | 0.00141 | 0.00078   | 0.00542 | 0.00144 |
| PG(36:2)               | 0.00000 | 0.03903 | 0.00104 | 0.00032 | 0.00000 | 0.00022 | 0.00054 | 0.00114 | 0.00033 | 0.00093 | 0.00039 | 0.00101 | 0.00007 | 0.00258 | 0.00158 | 0.00010 | 0.00038 | 0.00414 | 0.00030 | 0.00207 | 0.00009   | 0.00202 | 0.00124 |
| PG(38:1)               | 0.00000 | 0.01576 | 0.00161 | 0.00034 | 0.00023 | 0.00000 | 0.00000 | 0.00000 | 0.00000 | 0.00000 | 0.00000 | 0.00047 | 0.00000 | 0.00000 | 0.00240 | 0.00000 | 0.00000 | 0.00000 | 0.00000 | 0.00015 | 0.00000   | 0.00000 | 0.00000 |
| PG(38:5)               | 0.00052 | 0.00329 | 0.00060 | 0.00161 | 0.00162 | 0.00269 | 0.00222 | 0.00110 | 0.00155 | 0.00187 | 0.00085 | 0.00398 | 0.00094 | 0.00114 | 0.00183 | 0.00022 | 0.00019 | 0.00075 | 0.00050 | 0.00122 | 0.00090   | 0.00058 | 0.00079 |
| PG(40:3)               | 0.00013 | 0.00016 | 0.00019 | 0.00000 | 0.00037 | 0.00000 | 0.00000 | 0.00066 | 0.00000 | 0.00705 | 0.00025 | 0.00047 | 0.00000 | 0.00110 | 0.00074 | 0.00000 | 0.00000 | 0.00000 | 0.00027 | 0.00000 | 0.00000   | 0.00025 | 0.00000 |
| PG(44:12)              | 0.00125 | 0.00199 | 0.00000 | 0.00028 | 0.00009 | 0.00079 | 0.00059 | 0.00153 | 0.00000 | 0.00225 | 0.00121 | 0.00090 | 0.00065 | 0.00090 | 0.00123 | 0.00039 | 0.00058 | 0.00182 | 0.00140 | 0.00107 | 0.00043   | 0.00266 | 0.00562 |
| PI(30:0)               | 0.00068 | 0.00031 | 0.00061 | 0.00035 | 0.00018 | 0.00035 | 0.00043 | 0.00000 | 0.00023 | 0.00045 | 0.00014 | 0.00119 | 0.00163 | 0.01303 | 0.00052 | 0.00423 | 0.00328 | 0.00346 | 0.00937 | 0.00150 | 0.00070   | 0.01269 | 0.00028 |
| PI(30:2)               | 0.03086 | 0.05320 | 0.04872 | 0.03223 | 0.03734 | 0.05967 | 0.03598 | 0.14510 | 0.03897 | 0.05656 | 0.06138 | 0.03046 | 0.03279 | 0.05586 | 0.02872 | 0.02659 | 0.06048 | 0.04906 | 0.07345 | 0.04033 | 0.03805   | 0.02424 | 0.02628 |
| PI(34:1)               | 0.01033 | 0.01340 | 0.01178 | 0.00455 | 0.00545 | 0.00956 | 0.00725 | 0.00894 | 0.00513 | 0.00780 | 0.00687 | 0.00451 | 0.00404 | 0.02556 | 0.00341 | 0.00525 | 0.00571 | 0.00986 | 0.00355 | 0.00878 | 0.00399   | 0.00611 | 0.01311 |
| PI(34:2)               | 0.00184 | 0.00330 | 0.00168 | 0.00228 | 0.00129 | 0.00173 | 0.00152 | 0.00068 | 0.00147 | 0.00145 | 0.00129 | 0.00084 | 0.00066 | 0.00168 | 0.00092 | 0.00131 | 0.00415 | 0.00184 | 0.01625 | 0.00197 | 0.00096   | 0.01548 | 0.01867 |
| PI(36:3)               | 0.00000 | 0.00000 | 0.00000 | 0.00041 | 0.00000 | 0.00000 | 0.00000 | 0.00008 | 0.00000 | 0.00000 | 0.00000 | 0.00000 | 0.00000 | 0.00012 | 0.00039 | 0.00003 | 0.00003 | 0.00000 | 0.00000 | 0.00000 | 0.00000   | 0.00000 | 0.00025 |
| PI(36:4)               | 0.00006 | 0.00048 | 0.00199 | 0.00948 | 0.00042 | 0.00013 | 0.00000 | 0.00096 | 0.00019 | 0.00058 | 0.00093 | 0.00393 | 0.00032 | 0.00165 | 0.00940 | 0.00000 | 0.00000 | 0.00000 | 0.00000 | 0.00012 | 0.00000   | 0.00000 | 0.00005 |
| PI(36:5)               | 0.00000 | 0.01952 | 0.00039 | 0.00527 | 0.00042 | 0.00000 | 0.00000 | 0.00012 | 0.00000 | 0.00000 | 0.00000 | 0.00048 | 0.00000 | 0.00000 | 0.00507 | 0.00000 | 0.00000 | 0.00000 | 0.00000 | 0.00000 | 0.00000   | 0.00000 | 0.00000 |
| PI(38:4)               | 0.00000 | 0.01123 | 0.01196 | 0.07704 | 0.00527 | 0.00823 | 0.00016 | 0.00468 | 0.00000 | 0.00568 | 0.00000 | 0.03074 | 0.00115 | 0.00392 | 0.06159 | 0.00000 | 0.00000 | 0.00332 | 0.00006 | 0.00027 | 0.00142   | 0.00000 | 0.00000 |
| PI(38:5)               | 0.00000 | 0.00025 | 0.00626 | 0.02982 | 0.00426 | 0.00413 | 0.00000 | 0.00520 | 0.00000 | 0.00188 | 0.00011 | 0.01138 | 0.00060 | 0.00000 | 0.02236 | 0.00000 | 0.00011 | 0.00067 | 0.00000 | 0.00000 | 0.00000   | 0.00049 | 0.00122 |
| PI(38:6)               | 0.00000 | 0.00010 | 0.00197 | 0.00733 | 0.00111 | 0.00000 | 0.00000 | 0.00000 | 0.00000 | 0.00000 | 0.00000 | 0.00182 | 0.00000 | 0.00000 | 0.00765 | 0.00000 | 0.00000 | 0.00000 | 0.00000 | 0.00000 | 0.00000   | 0.00000 | 0.00000 |
| PI(40:3)               | 0.01333 | 0.00617 | 0.01141 | 0.00577 | 0.00657 | 0.00664 | 0.00316 | 0.01295 | 0.00538 | 0.01847 | 0.01204 | 0.01022 | 0.01398 | 0.01425 | 0.01442 | 0.00348 | 0.01141 | 0.00933 | 0.00452 | 0.01221 | 0.00360   | 0.00699 | 0.00408 |
| PI(40:4)               | 0.00306 | 0.00139 | 0.00189 | 0.00342 | 0.00126 | 0.00444 | 0.00040 | 0.00029 | 0.00099 | 0.00316 | 0.00312 | 0.00294 | 0.00484 | 0.00462 | 0.00282 | 0.00037 | 0.00960 | 0.00259 | 0.00038 | 0.01010 | 0.00076   | 0.00150 | 0.00084 |
| PI(42:6)               | 0.00153 | 0.00343 | 0.00096 | 0.00049 | 0.00022 | 0.00034 | 0.00000 | 0.00000 | 0.00023 | 0.00135 | 0.00113 | 0.00031 | 0.00090 | 0.00111 | 0.00107 | 0.00000 | 0.00000 | 0.00058 | 0.00003 | 0.00063 | 0.00000   | 0.00000 | 0.00000 |
| PI(48:10)              | 0.00000 | 0.00064 | 0.00000 | 0.00000 | 0.00000 | 0.00016 | 0.00000 | 0.00089 | 0.00000 | 0.00007 | 0.00013 | 0.00000 | 0.00000 | 0.00000 | 0.00005 | 0.00000 | 0.00078 | 0.00110 | 0.00000 | 0.00000 | 0.00000   | 0.00000 | 0.00000 |
| PS(34:1)               | 0.17312 | 0.11154 | 0.40856 | 0.01688 | 0.00733 | 0.00466 | 0.00241 | 0.03152 | 0.00158 | 0.00164 | 0.00026 | 0.00069 | 0.00024 | 0.00026 | 0.00043 | 0.00013 | 0.00007 | 0.00000 | 0.00034 | 0.00016 | 0.00000   | 0.00023 | 0.00009 |
| PS(34:2)               | 0.05863 | 0.04302 | 0.12796 | 0.02608 | 0.02356 | 0.02488 | 0.01931 | 0.04499 | 0.01956 | 0.02296 | 0.02031 | 0.01623 | 0.01679 | 0.01305 | 0.03419 | 0.01087 | 0.01204 | 0.01361 | 0.01074 | 0.01743 | 0.01197</ |         |         |

|           |         |         |         |         |         |         |         |         |         |         |         |         |         |         |         |         |         |         |         |         |         |         |         |
|-----------|---------|---------|---------|---------|---------|---------|---------|---------|---------|---------|---------|---------|---------|---------|---------|---------|---------|---------|---------|---------|---------|---------|---------|
| SM(d36:1) | 3.06035 | 2.98403 | 3.93370 | 3.19362 | 2.65597 | 3.20376 | 3.10976 | 3.29061 | 3.05959 | 4.17283 | 3.84376 | 4.24230 | 2.72293 | 3.53640 | 5.11863 | 2.71442 | 2.23160 | 3.62662 | 3.03705 | 3.27777 | 2.58691 | 3.36657 | 3.16106 |
| SM(d36:2) | 1.23987 | 1.18936 | 1.51767 | 1.18894 | 1.07603 | 1.24710 | 1.22222 | 1.20698 | 1.26108 | 1.79014 | 1.40295 | 1.67469 | 1.33440 | 1.50252 | 1.68997 | 0.89644 | 0.86115 | 1.37668 | 0.97096 | 1.59531 | 1.00942 | 0.93134 | 1.14144 |
| SM(d36:3) | 0.03164 | 0.03021 | 0.03209 | 0.03413 | 0.02986 | 0.03874 | 0.03714 | 0.04379 | 0.03286 | 0.04881 | 0.03936 | 0.04063 | 0.03357 | 0.03897 | 0.03695 | 0.02966 | 0.03823 | 0.03235 | 0.03734 | 0.03198 | 0.01954 | 0.02818 | 0.03062 |
| SM(d37:0) | 0.04124 | 0.03780 | 0.06507 | 0.05676 | 0.04585 | 0.05939 | 0.05150 | 0.03677 | 0.04622 | 0.05837 | 0.05159 | 0.05979 | 0.04104 | 0.04872 | 0.06679 | 0.04197 | 0.03876 | 0.06552 | 0.04785 | 0.04667 | 0.03093 | 0.07991 | 0.05223 |
| SM(d37:1) | 0.39091 | 0.39295 | 0.52201 | 0.47893 | 0.41108 | 0.47383 | 0.40376 | 0.39493 | 0.44270 | 0.50206 | 0.52181 | 0.57977 | 0.37766 | 0.46842 | 0.65144 | 0.34170 | 0.31280 | 0.48702 | 0.40153 | 0.39450 | 0.28556 | 0.45110 | 0.41896 |
| SM(d37:2) | 0.25100 | 0.23158 | 0.33389 | 0.32589 | 0.27909 | 0.28034 | 0.25273 | 0.28465 | 0.28461 | 0.29826 | 0.28905 | 0.36849 | 0.26520 | 0.30410 | 0.36542 | 0.19189 | 0.18238 | 0.26247 | 0.20639 | 0.25136 | 0.17814 | 0.19624 | 0.23392 |
| SM(d37:3) | 0.03308 | 0.02347 | 0.03440 | 0.03250 | 0.02511 | 0.02880 | 0.02735 | 0.03288 | 0.02895 | 0.02915 | 0.03510 | 0.03604 | 0.03776 | 0.03472 | 0.04021 | 0.02132 | 0.01942 | 0.02906 | 0.02268 | 0.02959 | 0.01946 | 0.02119 | 0.02965 |
| SM(d38:0) | 0.08958 | 0.10865 | 0.16628 | 0.11855 | 0.11362 | 0.10619 | 0.07971 | 0.06306 | 0.10556 | 0.14331 | 0.13035 | 0.11912 | 0.08576 | 0.12535 | 0.16612 | 0.07225 | 0.08225 | 0.13762 | 0.10828 | 0.10098 | 0.05969 | 0.23422 | 0.13362 |
| SM(d38:1) | 0.78102 | 0.92211 | 1.22452 | 0.93011 | 0.94834 | 0.81871 | 0.77108 | 0.63816 | 0.86744 | 0.95929 | 1.16874 | 1.23540 | 0.82832 | 1.04731 | 1.41650 | 0.62180 | 0.57346 | 1.00795 | 0.77862 | 0.87799 | 0.52086 | 1.08088 | 0.93298 |
| SM(d38:2) | 1.01625 | 1.06990 | 1.55041 | 1.26732 | 1.17311 | 1.05135 | 1.03758 | 1.06197 | 1.12412 | 1.23851 | 1.29961 | 1.55428 | 1.16341 | 1.26855 | 1.73811 | 0.80375 | 0.63731 | 1.14916 | 0.97177 | 1.23344 | 0.65761 | 0.85813 | 0.95592 |
| SM(d38:3) | 0.08219 | 0.09405 | 0.09829 | 0.10180 | 0.09125 | 0.08437 | 0.07641 | 0.09811 | 0.08384 | 0.10016 | 0.09555 | 0.11860 | 0.09700 | 0.10321 | 0.12216 | 0.06338 | 0.05014 | 0.08862 | 0.07575 | 0.09190 | 0.05324 | 0.06954 | 0.08211 |
| SM(d39:0) | 0.00085 | 0.00453 | 0.00728 | 0.00444 | 0.00322 | 0.00509 | 0.00335 | 0.00116 | 0.00453 | 0.00267 | 0.00623 | 0.00978 | 0.00287 | 0.00497 | 0.00927 | 0.00274 | 0.00460 | 0.00549 | 0.00617 | 0.00213 | 0.00000 | 0.01633 | 0.00524 |
| SM(d39:1) | 0.08229 | 0.08881 | 0.14401 | 0.10550 | 0.09747 | 0.09773 | 0.05848 | 0.05920 | 0.08219 | 0.09417 | 0.10307 | 0.18065 | 0.07507 | 0.10571 | 0.15456 | 0.06073 | 0.07191 | 0.11627 | 0.09051 | 0.07419 | 0.04135 | 0.14171 | 0.11427 |
| SM(d39:2) | 0.16934 | 0.18589 | 0.25489 | 0.23729 | 0.19387 | 0.17109 | 0.14758 | 0.16755 | 0.17402 | 0.17567 | 0.18839 | 0.31705 | 0.15580 | 0.19191 | 0.27354 | 0.13013 | 0.11249 | 0.20414 | 0.16088 | 0.17319 | 0.10311 | 0.15138 | 0.18303 |
| SM(d39:3) | 0.02678 | 0.02680 | 0.04566 | 0.04100 | 0.04238 | 0.03407 | 0.03125 | 0.03097 | 0.03628 | 0.02540 | 0.03181 | 0.04156 | 0.03206 | 0.03675 | 0.04217 | 0.02183 | 0.01685 | 0.03122 | 0.01942 | 0.03480 | 0.01561 | 0.01417 | 0.02673 |
| SM(d40:1) | 0.19365 | 0.18774 | 0.36323 | 0.35352 | 0.28540 | 0.29376 | 0.21422 | 0.20428 | 0.28636 | 0.39623 | 0.22927 | 0.67234 | 0.17547 | 0.31044 | 0.39350 | 0.13777 | 0.17627 | 0.29251 | 0.22724 | 0.18244 | 0.15251 | 0.37223 | 0.33886 |
| SM(d40:2) | 0.78220 | 0.84370 | 1.12371 | 1.37705 | 1.00724 | 0.99326 | 0.83341 | 1.06730 | 0.97696 | 1.01486 | 0.86775 | 2.21715 | 0.73578 | 1.08559 | 1.34824 | 0.56374 | 0.54556 | 1.07211 | 0.81011 | 0.78782 | 0.60366 | 0.83768 | 1.11301 |
| SM(d40:3) | 0.13277 | 0.14639 | 0.21138 | 0.20966 | 0.15649 | 0.16939 | 0.15580 | 0.17487 | 0.18282 | 0.21245 | 0.15398 | 0.28925 | 0.15500 | 0.19461 | 0.25253 | 0.10102 | 0.08191 | 0.16794 | 0.12545 | 0.18237 | 0.09408 | 0.10609 | 0.16290 |
| SM(d41:1) | 0.03880 | 0.03469 | 0.08009 | 0.08768 | 0.05366 | 0.06015 | 0.05066 | 0.03583 | 0.05233 | 0.07717 | 0.05234 | 0.14514 | 0.03300 | 0.06246 | 0.08311 | 0.02615 | 0.04281 | 0.07182 | 0.05076 | 0.03995 | 0.03212 | 0.09297 | 0.08282 |
| SM(d41:2) | 0.27326 | 0.29305 | 0.39852 | 0.47876 | 0.36183 | 0.32406 | 0.31317 | 0.29287 | 0.34657 | 0.39669 | 0.30685 | 0.78502 | 0.25941 | 0.37000 | 0.45160 | 0.18229 | 0.22690 | 0.41422 | 0.30920 | 0.26098 | 0.19037 | 0.32956 | 0.43619 |
| SM(d41:3) | 0.05379 | 0.05864 | 0.08410 | 0.09157 | 0.06859 | 0.06182 | 0.06270 | 0.06194 | 0.06870 | 0.08667 | 0.05621 | 0.14167 | 0.05791 | 0.07315 | 0.09186 | 0.03779 | 0.03602 | 0.08000 | 0.05436 | 0.06246 | 0.03370 | 0.04729 | 0.07244 |
| SM(d42:1) | 0.25721 | 0.34093 | 0.47059 | 0.53961 | 0.44012 | 0.33596 | 0.39132 | 0.26541 | 0.41079 | 0.58803 | 0.39928 | 0.88351 | 0.26648 | 0.40910 | 0.50101 | 0.19660 | 0.29658 | 0.42831 | 0.30115 | 0.29895 | 0.21009 | 0.61151 | 0.53839 |
| SM(d42:2) | 1.70964 | 2.03392 | 2.68477 | 3.10299 | 2.49980 | 1.96861 | 2.07588 | 1.69413 | 2.29284 | 3.04260 | 2.26270 | 5.06834 | 1.66311 | 2.50337 | 3.37617 | 1.26815 | 1.74327 | 2.79423 | 2.12455 | 1.85947 | 1.33556 | 2.85410 | 3.35718 |
| SM(d42:3) | 0.67627 | 0.74051 | 1.08575 | 1.26888 | 0.92215 | 0.79962 | 0.78739 | 0.84966 | 0.85747 | 1.19276 | 0.79632 | 1.78752 | 0.81439 | 0.95792 | 1.35886 | 0.53893 | 0.56214 | 1.03301 | 0.75055 | 0.88367 | 0.48606 | 0.67684 | 1.01746 |
| SM(d43:1) | 0.00179 | 0.00180 | 0.00796 | 0.00766 | 0.00585 | 0.01137 | 0.00397 | 0.00425 | 0.00560 | 0.01610 | 0.00337 | 0.03904 | 0.00134 | 0.00936 | 0.00483 | 0.00263 | 0.00903 | 0.01302 | 0.00570 | 0.00097 | 0.00320 | 0.02118 | 0.01685 |
| SM(d43:2) | 0.06101 | 0.04858 | 0.09858 | 0.09299 | 0.08290 | 0.09780 | 0.07281 | 0.05666 | 0.07967 | 0.14356 | 0.07063 | 0.29081 | 0.05261 | 0.09685 | 0.10772 | 0.05505 | 0.09608 | 0.13114 | 0.09167 | 0.06208 | 0.06450 | 0.16157 | 0.16320 |
| SM(d43:3) | 0.00153 | 0.00000 | 0.01635 | 0.01960 | 0.01414 | 0.01094 | 0.00933 | 0.00680 | 0.00907 | 0.03149 | 0.00310 | 0.05619 | 0.00808 | 0.01434 | 0.02728 | 0.01049 | 0.01058 | 0.02650 | 0.01046 | 0.01185 | 0.00742 | 0.01761 | 0.02775 |
| SM(d44:2) | 0.00435 | 0.00293 | 0.01641 | 0.01899 | 0.01287 | 0.01850 | 0.01122 | 0.00956 | 0.01564 | 0.03607 | 0.01159 | 0.07436 | 0.01055 | 0.02238 | 0.02296 | 0.01257 | 0.02752 | 0.03048 | 0.01837 | 0.01128 | 0.01727 | 0.06335 | 0.05339 |
| SM(d44:3) | 0.00085 | 0.00097 | 0.00661 | 0.01451 | 0.00441 | 0.00925 | 0.00319 | 0.00472 | 0.00779 | 0.02712 | 0.00290 | 0.04314 | 0.00106 | 0.01024 | 0.01583 | 0.00476 | 0.01006 | 0.02045 | 0.00760 | 0.00933 | 0.00739 | 0.01728 | 0.02677 |
